# Supplementary material for: Re-Discovery of Giardiavirus: Genomic and Functional Analysis of Viruses from Giardia duodenalis Isolates
Source: MDPI journal article supplement (doi:10.3390/biomedicines9060654), 2021-06-08

| 10   |      |         | 20   |      |        | 30   |      |       | 40   |       |        | 50   |      |        | 60   |      |        | 70   |       |          | 80    |      |        | 90   |      |        | 100  |     |         |      |      |          |
|------|------|---------|------|------|--------|------|------|-------|------|-------|--------|------|------|--------|------|------|--------|------|-------|----------|-------|------|--------|------|------|--------|------|-----|---------|------|------|----------|
| MVWG | TGYG | NP      | SPLN | PYGF | AS     | LHRG | GLNP | LI    | LA   | PENIT | LD     | LRTQ | NDYE | ET     | HGES | PEVP | PK     | SIAP | AQRQ  | NV       | PVLQ  | QONQ | EN     | DNHA | LGGS | ED     | AKDE | RI  | FS      | AIKT | LYNY | YS       |
| EGS  | STP  | IMP     | LVN  | R    | GLDA   | LAKI | DAT  | LTK   | VNMA | AI    | IFA    | LRT  | PF   | YSY    | YQ   | R    | SNRRL  | TTS  | AVCY  | ART      | GLSS  | F    | LTVNK  | TYTS | NSP  | LKG    | GSRG | WPI | PNV     | GVSP | HVAE | PH       |
| MRT  | LS   | PIGLE   | MFS  | QNL  | ATL    | KTLL | T    | ASSK  | FTQ  | SL    | YTDI   | LIS  | P    | FEWL   | HVM  | Q    | VSNTY  | PI   | LRALL | AL       | IHL   | P    | SGSN   | CSL  | SS   | FI     | SDP  | Q   | FTVSH   | STNM | S    | NRDY     |
| CLHT | WAS  | KD      | VFR  | QNP  | IPQS   | LTP  | TL   | LAPE  | SSAR | V     | LPIAA  | LVS  | P    | FEWL   | LALV | SS   | QGF    | F    | LYSK  | DASIN    | TVDI  | SG   | RGRI   | SLP  | PD   | VANL   | DHL  | R   | WNL     | FDGH | R    | YIDV     |
| IVG  | VD   | RDYV    | PYQ  | N    | YVHG   | GKGP | NG   | TNDY  | GNAD | V     | HDGIG  | TIF  | S    | FNNDY  | NVQ  | T    | SDLLG  | L    | LTL   | WNHIT    | TYATE | E    | EEVT   | AIK  | I    | AAAFAL | VVP  | VQ  | PIVS    | GLP  | RA   | FSHT     |
| SYQ  | PP   | SSENC   | YTTD | T    | AEVKS  | TWDT | V    | ELSVQ | V    | N     | NAMVLG | LPF  | Q    | QOTVSS | AQW  | F    | NMNDIK | EIS  | M     | FVKVNL   | PLQN  | L    | LDLSL  | DMME | F    | YAPT   | LQ   | L   | YIRSDN  | L    | L    | ISAART   |
| LG   | I    | GYTAL   | FAD  | F    | YASVPA | QSFY | H    | DRMVT | SPIS | K     | QTSY   | YER  | F    | IERFVD | DFV  | G    | WRCDL  | F    | N     | LDTLLAAK | RIAG  | V    | ASSPI  | PMH  | Q    | LRCP   | LI   | P   | IMHYTGL | HF   | Q    | EHITVR   |
| DD   | V    | AGVEGLQ | IVM  | N    | DQSKI  | VYDA | L    | GTAAP | SR   | L     | AKLWDS | RLS  | W    | ASD    | CAI  | P    | LSDRRL | EI   | I     | YAAVAT   | PTQ   | E    | RRATG  | F    | Y    | TFSFNP | LS   | S   | FNASEPI | N    | T    | SINLTPPY |
| DDT  | ST   | TVIQN   | LSMP | Q    | MLSG   | PYAE | S    | TFVYV | SAD  | N     | EWIPTS | GPAW | K    | PVYLE  | NVVK | R    | SGRM   | LAE  | L     | RIASN    | GS    | G    | DRTFDL | V    |      |        |      |     |         |      |      |          |

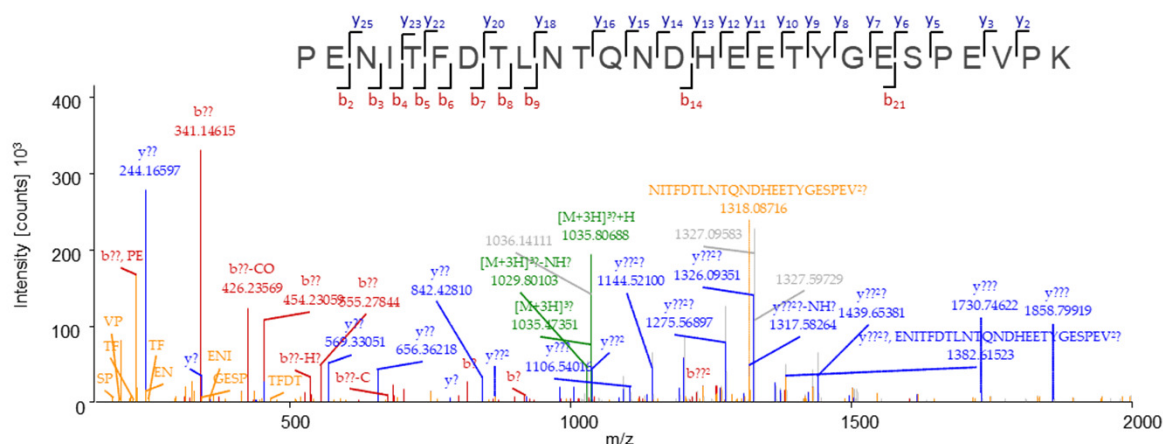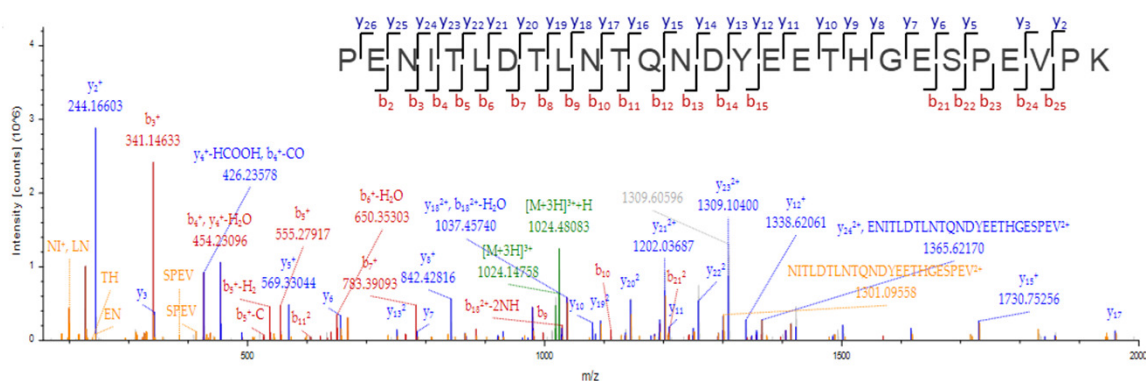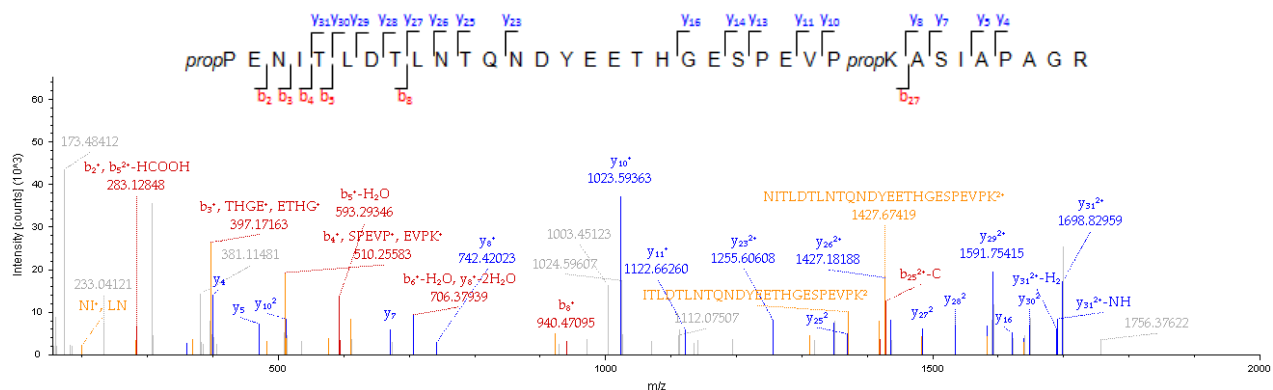

Supplement: s1 [file s1]
