# Supplementary material for: Re-Discovery of Giardiavirus: Genomic and Functional Analysis of Viruses from Giardia duodenalis Isolates
Source: MDPI journal article supplement (doi:10.3390/biomedicines9060654), 2021-06-08
Supplement: s1 [file s1]

A

CP\_HP LAPENITFDTLNTQNDHEETYGESPEVPKASIAPAGRQNPVVLQQNQENEDNHALGGSSEDAKDEREIQS  
CP\_J1710\_A .....H.....  
CP\_P2MER .....D.....F  
CP\_CAT MVWGTGYGNPSPLNPYGFASLHRGGLNPLI .....L.....Y...H.....K.....RF  
CP\_L13218 MVWGTGYGNPSPLNPYGFASLHRGGLNPLI .....H.....H.....RF  
CP\_AF52521 MVWGTGYGNTSPLNPYGFASLHRGGLNPLI .....K.....F  
CP\_DQ23886 MVWGTGYGNTSPLNPYGFASLHRGGLNPLI .....K.....F

CP\_HP SAIKTLNYYSEGPSTPIMPHLVNRLRGLDALAKVDATLSKVDMAAYIFALRPTFPYSYGYKQRFNSRRLTTSALCYARTGLSSFLTVDKTYTSNSPL  
CP\_J1710\_A .....L.....  
CP\_P2MER .....L.....  
CP\_CAT .....I...T.....V.....N.....  
CP\_L13218 .....I...T.....L.....  
CP\_AF52521 .....I.....L.....  
CP\_DQ23886 .....I.....V.....P.....T...S...L.....

CP\_HP KGGSRGWPIFN[V]GVSPHVAEPMRTLSPIGLEVENLATSQFSKTLTASSKVFTQSLYTADILSIFGEVFLPHVMQPVSNYTPILVRALLALIHILGSG  
CP\_J1710\_A .....[V-].....  
CP\_P2MER R.....[V-].....S.....  
CP\_CAT .....[V-].....P.  
CP\_L13218 .....[V-]D..S.....P.  
CP\_AF52521 .....[-I].....P.  
CP\_DQ23886 .....[-I].....P..P.

CP\_HP SGNCSSLSSIFESSIPQFLTISHSTNMSNRTRYCLHTWSAYKDMFRNGIPPQSTFPPTLAPEGSSARILIPAALVTSPMFPWLLVLVSSGPQFFLYSKDA  
CP\_J1710\_A .....L.....  
CP\_P2MER .....F.V.....L.....V.....A.....  
CP\_CAT .....V.....R.....L.....V...E.....I.....  
CP\_L13218 .....V.....R.....L.....V...E.....I.....  
CP\_AF52521 .....I...H.....  
CP\_DQ23886 .....I...H.....

CP\_HP SINTVDIGSRGRITSPIPDVAHLDLHRLWNLFRFDGYRYIDVVIVGVDRDYVWPYQNGVYVHGGKGPKGTDNYENADVHDGIGTIFSSFNN[N-]VNVQT  
CP\_J1710\_A .....N.....[ND].....  
CP\_P2MER .....G.....D[N-].....  
CP\_CAT .....N.....H.....N.....G.....D[N-].....  
CP\_L13218 .....K.....A.....N...G...G.....[N-].....  
CP\_AF52521 .....H.....S.....G.....[N-].....  
CP\_DQ23886 .....S.....G.....[N-].....



CP\_HP SDLLLGLSTLWNHITTTYATEEEVTMAIKIAAAFALVYPVQPIVYSGCSRALY [NS] HTSYFQPSSENCYTTDTAEVKSTWDTVELSVQVNNAMVLGMTLPF  
 CP\_J1710\_A ..... [N-] .....  
 CP\_P2MER ..... P... [N-] .....  
 CP\_CAT ..... I...L..... P..FQ [-S] .....Y.....  
 CP\_L13218 .....M...L..... PK.FQ [-R] .....Y.....A.....V.....  
 CP\_AF52521 .....A..... S.FH [N-] .....D.....  
 CP\_DQ23886 .....A..... S.FH [N-] .....L.D.....



CP\_HP GQPTVSSAQWFNNIDKAEISMFKVGNLPLQNLDYLSLDMMEFYAPTGTQLYDIRSDSLISSAHRTVNLGIGYTALADFFAYLASVPAQSFYHNRMTSPI  
 CP\_J1710\_A .....  
 CP\_P2MER .....  
 CP\_CAT ..... N..L.....D.....  
 CP\_L13218 .....L...Y..... N..L.....D.....  
 CP\_AF52521 .....R..... N.....D.....  
 CP\_DQ23886 .....R.....K.V..... N.....V.....D.....



CP\_HP SKQAYSVYERFIERFIDDFVGW [GD] RCDLFNLDTLGAKRIAGVASSPIPWHCSLQRCPLPIIMHYTGLHFGQEHIRVRDVAGVEGLQQIVLRNDQGSIVL  
 CP\_J1710\_A ..... [G-] .....V.....  
 CP\_P2MER ..... [-D] .....L.....K.....  
 CP\_CAT .....T.....V..... [-D] .....A.....T.....M.....K..V  
 CP\_L13218 .....T..... [-D] .....H.....T.....T.....M.DF..R..V  
 CP\_AF52521 ..... [G-] .....H..H.V..P..L.....T.....  
 CP\_DQ23886 ..... [G-] .....H..H.V..P..L.....A.....Q.....T.....Q.....



CP\_HP DALGTAAPSRSLAVKLDWSRLSAWYSDTTCAIP [IL] SDRVMEIVNYAAIWDPTQERRATGFFVYTYFSPNFLSSFNVSEPIFNKTINLTPPYDDTSQTVIQNL  
 CP\_J1710\_A ..... [I-] .....  
 CP\_P2MER ..... [-L] .....  
 CP\_CAT ..... [-L] .....IT.....  
 CP\_L13218 ER.....I..... [-L] .....H..QVSCHTLAPISFRALTCLSLYSIRVSTLHHLMTTRAKI  
 CP\_AF52521 .....K..... [-L] .....QVSCHTLAPTSFRALTCLSLYSTRPSTLHHLMTTRAKI  
 CP\_DQ23886 .....R.....K.G..... [-L] .....QVSCHTLAPTFFRALTCLSLYSTRPSTLHHV




CP\_HP SMPQMLSFDPYYESTFYVSADNEWVPTSGPAWKVPYLENVVKRSGRLLAELRIASNNGSGDRFTLDDV  
 CP\_J1710\_A .....  
 CP\_P2MER .....  
 CP\_CAT .....I.....
