# Supplementary material for: Re-Discovery of Giardiavirus: Genomic and Functional Analysis of Viruses from Giardia duodenalis Isolates
Source: MDPI journal article supplement (doi:10.3390/biomedicines9060654), 2021-06-08
Supplement: s1 [file s1]

|            |     |                                                                                                                              |
|------------|-----|------------------------------------------------------------------------------------------------------------------------------|
| L13218.1   | 1   | GGAAGGAGUGCCAGGCCAUUACCUUCCGCCCCUGCCUAAACAAAACUGGCUCGCCAGAGGCGGGGGGCGUGGUAGACGGUAUGUCUAGGUCCAGAGAAAGCGGCCGUGUUAGGCUGCUA      |
| AF525216.1 | 1   | .....C.....UA.....U.....A..C..G                                                                                              |
| DQ238861.1 | 1   | .....C.....UA.....U.....A..C..G                                                                                              |
| CAT        | 1   | .....A.....A.....A.....A.....                                                                                                |
| HP         | 1   | .....A.....UA.....C.....A.....G                                                                                              |
| P2MER      | 1   | .....A.....G.....UA.....C.....A.....G                                                                                        |
| J1710_A    | 1   | .....A.....UA.....A.....G                                                                                                    |
|            |     |                                                                                                                              |
| L13218.1   | 121 | GACUUCGCCACGCUUACACCAUUGAGAACACAUAGGUGGUGUAAUUAUUGUGUUUGGCUGCGUGUGUCACGAGCACGAUCUAUGGGGGAAUCUAACCCAGGUGGUGUUGUGUAUGAUGA      |
| AF525216.1 | 121 | .....C.....A.....C.C...A.....A.                                                                                              |
| DQ238861.1 | 121 | .....C.....A.....C.C...A.....A.                                                                                              |
| CAT        | 121 | .....C.....                                                                                                                  |
| HP         | 121 | .....C.....A.....C.....A.                                                                                                    |
| P2MER      | 121 | .....C.....A.....C.....A.                                                                                                    |
| J1710_A    | 121 | .....C.....A.....C.....A.                                                                                                    |
|            |     |                                                                                                                              |
| L13218.1   | 241 | GGUACAAGCCCGUCAACACCACAGGUGGAGAGGACAGGAGUCUAAUUCCCCUCCAAAAACAGCAGUGGUCGCCCCUCAUGCCCUAUGAAACAUUAGGGGGCCGACACUAGUGGGCA         |
| AF525216.1 | 241 | .....C.....U.G.....G.....                                                                                                    |
| DQ238861.1 | 241 | .....C.....U.G.....G.....                                                                                                    |
| CAT        | 241 | .....C.....CUUU.....G.....                                                                                                   |
| HP         | 241 | .....C.....U.G.....G.....                                                                                                    |
| P2MER      | 241 | .....C.....U.G.....G.....                                                                                                    |
| JA1710_A   | 241 | .....C.....U.G.....G.....                                                                                                    |
|            |     |                                                                                                                              |
| L13218.1   | 361 | AGCCCCAUGGUGUGGGGGACUGGAUAUGGGAACCCAGUCCGUUAAACCCGUACGGCUUCGCCAGCCUACACCGGGGGGGCUUAAUCCCCUUAUU                               |
| AF525216.1 | 361 | .....A.....UUGGCACCUGAAAAUUAUACU                                                                                             |
| DQ238861.1 | 361 | .....A.....UUU.....C.....                                                                                                    |
| CAT        | 361 | .....C.....                                                                                                                  |
| HP         | 361 | .....A.....UGA.....                                                                                                          |
| P2MER      | 361 | .....A.....UGA.....                                                                                                          |
| J1710_A    | 361 | .....A.....UGA.....Y.....                                                                                                    |
|            |     |                                                                                                                              |
| L13218.1   | 478 | UUUGACACUUUAAACACACACAAUGAUCACGAGGAGACCCAUGGAGAGUCUCCAGAGGUUCCUAAGGCCUCGAUCGCGCCUGCCGGGAGGCAGAAUGUCCCGGUUCUCCAACAAAUAUCAA    |
| AF525216.1 | 478 | .....G.....G.....C.....U.C.....A..                                                                                           |
| DQ238861.1 | 481 | .....G.....G.....C.....U.C.....A..                                                                                           |
| CAT        | 478 | C.....U.....G.....C.....CU.....C.....                                                                                        |
| HP         | 479 | .....G.....G.....C.....U.C.....                                                                                              |
| P2MER      | 479 | .....G.....G.....C.....U.C.....                                                                                              |
| J1710_A    | 479 | ...C.....G.....G.....C.....U.C.....                                                                                          |
|            |     |                                                                                                                              |
| L13218.1   | 598 | GAAAACGAAGAUAAUACACGCGCUGGGCGGUAGCGAGGACGCCAAAGAUGAGCGCGAAAUACGAUUCUCAGCCAUA AAAACUCUCUACAAUUAUUAUCUACAGAGGGUCCUUCGACCCCAAUU |
| AF525216.1 | 598 | .....C.....C.....AG..U...U.....A.....U.....                                                                                  |
| DQ238861.1 | 601 | .....C.....C.....AG..U...U..U.....A.....U.....                                                                               |
| CAT        | 598 | .....A.....C.....G.....                                                                                                      |
| HP         | 599 | .....Y.....C.....C.....AG.CU...U.....A.....                                                                                  |
| P2MER      | 599 | .....G.....C.....C.....AG..U...U.....C.....A.....                                                                            |
| J1710_A    | 599 | .....U.....Y.....C.....C.....AG.CU...U.....A.....                                                                            |

First cytosine insertion and premature CP ORF stop

|            |      |                                                                                                                          |
|------------|------|--------------------------------------------------------------------------------------------------------------------------|
| L13218.1   | 718  | AUGCCGCAUUUAGUUAACAGGUUACGUGGAUUAGAUGCCCUUGCCAAGAUAGACGCGACGCGUACCAAGGUGGAUAUGAACGCGGCCUACAUAUUCGCCUGAGACCGACUUUCCGUAU   |
| AF525216.1 | 718  | .....A.....C.....A.....U..A.....G.....G.....C.....                                                                       |
| DQ238861.1 | 721  | .....A.....C.....A.....U..A.....G.....G.....C.....                                                                       |
| CAT        | 718  | .....C.....A.....U..A.....G.....G.....                                                                                   |
| HP         | 719  | .....A.....C.....A.....U..A.....G.....G..... <b>R</b> .....                                                              |
| P2MER      | 719  | .....A.....C.....A.....U..A..U..G.....G.....                                                                             |
| J1710_A    | 719  | .....A.....C.....A.....U..A.....G.....G.....A.....                                                                       |
|            |      |                                                                                                                          |
| L13218.1   | 838  | UCGUUAUGGUAUAAACAGCGCUUCAGUAACAGGAGAUUAACCACUAGUGCGCUUUGCUACGCAAGGACGGGCUAUCCCUCAUUUCUGACCGUCGACAAAACGUACACAUCUAACUCUCCA |
| AF525216.1 | 838  | .....A..U.....G.....A..C.....A.....G..C.....                                                                             |
| DQ238861.1 | 841  | .....A..U...C.....G..G.....A..C.....A.....G..C.....                                                                      |
| CAT        | 838  | .....G.....G.....C.....A.....C.....                                                                                      |
| HP         | 839  | .....A..U.....G.....A..C.....A.....G..C.....                                                                             |
| P2MER      | 839  | .....A..U.....G.....A..C.....A.....G..C.....                                                                             |
| J1710_A    | 839  | .....A..U.....G..... <b>V</b> .....A..C.....A.....G..C.....                                                              |
|            |      |                                                                                                                          |
| L13218.1   | 958  | UAAAAAGGGGGCUCUAGAGGGUGGCCCAUUUUAACGUGGAUGUUUCAUCACACGUGGCGGAGCCUCACAUGAGGACAUUGUCACCUAUCGGUCUUGAAGUAUUCAAUCUGGCUCACGUCU |
| AF525216.1 | 958  | .....U...A..A..G.....GC.....U...                                                                                         |
| DQ238861.1 | 961  | .....U...A..A..G.....GC.....U...                                                                                         |
| CAT        | 958  | .....A..G.....GC.....C.....G.....                                                                                        |
| HP         | 959  | ..... <b>R</b> ..A..G.....GC.....U...                                                                                    |
| P2MER      | 959  | ...G.....A..G.....GC.....U...                                                                                            |
| J1710_A    | 959  | ..... <b>V</b> .....T..A..G.....GC..... <b>R</b> .....U...                                                               |
|            |      |                                                                                                                          |
| L13218.1   | 1078 | CAAUUUUCGAAAACUCUAUUAACUGCAUCAUCGAAAGUCUUCACGCAAUCGCUCUACACUGCUGACAUACUAUCGAUCUUUGGUGAGGUGUUCUGCCACACGUGAUGCAACCGGUCUCA  |
| AF525216.1 | 1078 | ..G.....G..A.....                                                                                                        |
| DQ238861.1 | 1081 | ..G.....G..A.....                                                                                                        |
| CAT        | 1078 | ..G.....G..A.....                                                                                                        |
| HP         | 1079 | ..G.....A.....                                                                                                           |
| P2MER      | 1079 | ..G.....A.....U.....T.....                                                                                               |
| J1710_A    | 1079 | ..G.....A.....                                                                                                           |
|            |      |                                                                                                                          |
| L13218.1   | 1198 | AACUACACUCCAAUACUUGUGAGGGCACUAUUGGCCUUGAUCCACAUACUGGGGCCAGGAUCUGGUAUUGCUCACUUUCAUCGUCUAUCUUCGAGAGCUCAAUCCACAAUCCUACG     |
| AF525216.1 | 1198 | .....G.....A.....U.....U.....U..A...                                                                                     |
| DQ238861.1 | 1201 | .....C.....G.....U.....U.....U..A...                                                                                     |
| CAT        | 1198 | .....G.....U.....U.....                                                                                                  |
| HP         | 1199 | .....G <b>V</b> .....U.....U.....U..A...                                                                                 |
| P2MER      | 1199 | .....G.....U.....C.....U.....U..A...                                                                                     |
| J1710_A    | 1199 | .....GU.....U.....U.....U..A...                                                                                          |
|            |      |                                                                                                                          |
| L13218.1   | 1318 | GUAAGUCAUAGUACGAACAUGUCGAAUAGAACGAGGUACUGCUUACAUACGAGGUCUGCUUACAAGGAUAUGUUCAGGAACGGUAUCCCACCUCAGUCGACGUUGCCACCGACGCUCGCG |
| AF525216.1 | 1318 | A....C.....A.....C.....AU.....A.....U.....                                                                               |
| DQ238861.1 | 1321 | A....C.....A.....C.....AU.....A..U.....C.....U.....                                                                      |
| CAT        | 1318 | .....A.....C.....C..AU...C.....A..U.....                                                                                 |
| HP         | 1319 | A....C.....A.....C.....AU.....A.....U.....                                                                               |
| P2MER      | 1319 | A....C.....A.....C.....AU.....A.....U.....                                                                               |
| J1710_A    | 1319 | A....C.....A.....C.....AU.....A.....U.....                                                                               |

|            |      |                                                                                                                           |
|------------|------|---------------------------------------------------------------------------------------------------------------------------|
| L13218.1   | 1438 | CCGGAGGGGUCCUCUGCUCGGGUUUUAAUCCAGAGGCCCUAGUGACCAGCCCUAUGUUUCCAUGGUUACUUUAGUCUCGAGCGGCCACAGUUCUUCUUGUAUUCAAAGGACGCU        |
| AF525216.1 | 1438 | ..A.....A.C.....C.....G.A.....                                                                                            |
| DQ238861.1 | 1441 | ..A.....A.C.....C.....G.A.....                                                                                            |
| CAT        | 1438 | ..A.....C.....C...G.....U.....C.....GC.....                                                                               |
| HP         | 1439 | ..A.....A.C.....C <sup>R</sup> ...G.....U.....C.....G.A.....                                                              |
| P2MER      | 1439 | ..A.....A.C.....C...G.....U.....C.....G.A.....                                                                            |
| J1710_A    | 1439 | ..A..... <sup>M</sup> ...A.C.....CA...G.....U.....C.....U.A.....                                                          |
|            |      |                                                                                                                           |
| L13218.1   | 1558 | AGUAUUAAUACCGUAGACAUCGGUUCGAGGGGGAGGAUUACAUCACCAAUCCUGACGUCGCCAAGCUUGAUCUCCACAGACUCUGGAAUCUCUCCGUUUUGAUGGUUACCGCUACAC     |
| AF525216.1 | 1558 | .....C.....U.....C.C.....U...                                                                                             |
| DQ238861.1 | 1561 | .....U.....C.C.....U...                                                                                                   |
| CAT        | 1558 | .....G.....U.....C.....C.....                                                                                             |
| HP         | 1559 | .....C.C.....U...                                                                                                         |
| P2MER      | 1559 | .....U.....U.....C.C.....U...                                                                                             |
| J1710_A    | 1559 | .....C.C.....U...                                                                                                         |
|            |      |                                                                                                                           |
| L13218.1   | 1678 | GACGUGGUCAUAGUGGGCGCGGAUAGAGAUUACGUGUGGCCCUAUCAAAAUGGCGUGUAUGUACACGGCGGCAAGGGACCCAAUGGUACUGGCAACUACGGGAACGCUGACGUUCAUGAC  |
| AF525216.1 | 1678 | .....UA.G.....U.....U.....A.....A.....A.....U.....C...                                                                    |
| DQ238861.1 | 1681 | .....UA.G.....U.....U.....A.....A.....A.....U.....C...                                                                    |
| CAT        | 1678 | .....U.U.....A.....U.....A.....                                                                                           |
| HP         | 1679 | .....U.....U.....U.....A.....A.....A.....U.....C...                                                                       |
| P2MER      | 1679 | .....U.....U.....U.....A.....A.....U.....C...                                                                             |
| J1710_A    | 1679 | .....U.....U.....U.....A.....AA.....A.....U.....C...                                                                      |
|            |      |                                                                                                                           |
| L13218.1   | 1798 | GGAAUAGGGACGAUAAUUUCGUCUUUACAACAAGUUAACGUGCAAACGUGCCGACCUC AUGCUGGGCCUAUUGACCCUGUGGAACCACAUAAACGACUACGUACGCUACUGAGGAGGAG  |
| AF525216.1 | 1798 | .....C..U..U.....C..A..U..C.....U.....G.....                                                                              |
| DQ238861.1 | 1801 | .....C..U..U.....C..A..U..C.....U.....G.....                                                                              |
| CAT        | 1798 | .....C..U..G.....U.....UU.....U.....                                                                                      |
| HP         | 1799 | .....C..U.....U.....A..U..C.....                                                                                          |
| P2MER      | 1799 | .....C..U..G.....U.....A..U..C.....                                                                                       |
| JA1710_A   | 1799 | .....C..U..... <sup>R</sup> .....U.....A..U..C.....                                                                       |
|            |      |                                                                                                                           |
| L13218.1   | 1918 | GUCACCAUGGCGAUAAAGAUUGCAGCGGCUUUUGCCCUUGUCUACCCAGUACAGCCUUAUUGUCUACUCCGGUUGCCCCGAAAGCUUUUCAGAGACACACGUCUACUACCAGCCCUCAUCG |
| AF525216.1 | 1918 | ..U.....U..C..UU..GC.....U.AU.....U.U.....                                                                                |
| DQ238861.1 | 1921 | ..U.....U..C..UU..GC.....U.AU.....U.U.....                                                                                |
| CAT        | 1918 | .....C.....GG..C.....U.....U.....                                                                                         |
| HP         | 1919 | ..U.....U..C..U..GG..C..U.U.AU.....U.....                                                                                 |
| P2MER      | 1919 | ..U.....U..C.....GG..C..U.U.AU.....U.....                                                                                 |
| J1710_A    | 1919 | ..U.....U..C..U..GG..C..U.U.AU.....U.....                                                                                 |
|            |      |                                                                                                                           |
| L13218.1   | 2038 | GAGAACUGCUACGCAACCGACACGGCUGAAGUCAAGAGCGUGUGGGAUACGGUCGAGCUUAGCGUACAGGUUAAUAACGCUAUGGUACUAGGUUAGACACUACCGUUUGGCCAACCUACA  |
| AF525216.1 | 2038 | .....A.....U.....G.....AC.....U.....CG.....                                                                               |
| DQ238861.1 | 2041 | .....A.....U.....G.....AC.....U.....C.....CG.....                                                                         |
| CAT        | 2038 | .....A.G.....U.....G.....AC.....U.....C.....                                                                              |
| HP         | 2039 | .....A.....G.....AC.....U.....C.....                                                                                      |
| P2MER      | 2039 | .....A.....G.....AC.....U.....C.....A.....                                                                                |
| J1710_A    | 2039 | .....A.....G.....AC.....U.....C.....                                                                                      |



**Second cytosine insertion and CP ORF frame shift**

|            |      |                               |                                                                                             |
|------------|------|-------------------------------|---------------------------------------------------------------------------------------------|
| L13218.1   | 2878 | AUAUGGGAUCCUACACAGGAAAGACACGC | ACAGGUUUCGUGUACACAUACUUUAGCCCCAAUUUCCUUUCGAGCUUUAAACGUGUCUGAGCCUAUAUUCAAUACGAGUAUCAACCUUACA |
| AF525216.1 | 2878 | .....G.....G.....             | .....C.....C.C.A.GCC.....                                                                   |
| DQ238861.1 | 2881 | .....G.....G.....             | .....C.U.....C.C.A.GCC.....                                                                 |
| CAT        | 2878 | .....G.....GU.....            | .....C.....C.....                                                                           |
| HP         | 2879 | .....G.....G.....             | .....C.....C.A..CC.....                                                                     |
| P2MER      | 2879 | .....G.....G.....             | .....C.....C.A..CC.....                                                                     |
| J1710_A    | 2879 | .....G.....G.....             | .....C.....C.A..CC.....                                                                     |

**CP ORF stop codon (Wang et al., 1993)**

|            |      |                                |                                                                                            |
|------------|------|--------------------------------|--------------------------------------------------------------------------------------------|
| L13218.1   | 2997 | CCACCUUAUGACGACACGAGCCAAGCUGAA | UUCAAAAUUUGUCCAUGCCACAGAUAGCUCAGCUUCGAUCCCUACUACGAGUCUACGUUCUAUGUGGUCUCCGCGGAUAACGAGUGGAUA |
| AF525216.1 | 2997 | .....C..U.....A.....           | .....                                                                                      |
| DQ238861.1 | 3000 | ...G...C..U.....A.....         | .....                                                                                      |
| CAT        | 2998 | ....C..C..U.....C.CA.....      | .....                                                                                      |
| HP         | 2999 | .....C..U.....A.....           | .....G..                                                                                   |
| P2MER      | 2999 | .....C..U.....A.....           | .....G..                                                                                   |
| J1710_A    | 2999 | .....C..U.....A.....           | .....G..                                                                                   |

**Uracil insertion**

**Alternative +1/-2 ribosomal frameshift**

|            |      |                                                                                                                         |      |
|------------|------|-------------------------------------------------------------------------------------------------------------------------|------|
| L13218.1   | 3117 | CCGACUUCAGGGCCUGCUUGGAAGGUACCAUAUCUGGAAAACGUAGUUAAGCGGUCUGGCAGGCGCUUGCUGGCGGAGCUCAGGAUAGCAUCCAAUAACGGGUCUGGAGACCGUACCUU | -    |
| AF525216.1 | 3117 | .....C.....                                                                                                             | -    |
| DQ238861.1 | 3120 | .....C.....                                                                                                             | -    |
| CAT        | 3118 | ....C.....C....G.....                                                                                                   | CUUU |
| HP         | 3119 | ....C.....C.....                                                                                                        | CUUU |
| P2MER      | 3119 | ....C.....C.....T.....C.....                                                                                            | CUUU |
| J1710_A    | 3119 | ....C.....C.....                                                                                                        | CUUU |

**New CP ORF stop codon**

|            |      |                                                                                                                          |
|------------|------|--------------------------------------------------------------------------------------------------------------------------|
| L13218.1   | 3236 | CUUGACGACGUGUAAGACAAGAAAGGGGAAGGCAUUUUACCUACUUCUCUGCUGCUUUGGGGGGCAAGAUCUGGAAUUCGUAUGCGCUCCACUGUCGAGUAUCAGUCUCCAGGGCGGGCA |
| AF525216.1 | 3236 | .....A.....A.G...U.....                                                                                                  |
| DQ238861.1 | 3239 | .....A.....A.G...U.....                                                                                                  |
| CAT        | 3238 | CUUG.....UAA.....A.G...U.....A.....                                                                                      |
| HP         | 3239 | CUUG.....UAA.....A.G...U.....E.....                                                                                      |
| P2MER      | 3239 | CUUG.....UAA.....A.....C.A.G...U.....                                                                                    |
| J1710_A    | 3239 | CUUG.....UAA.....A.....A.G...U.....A.....                                                                                |

|            |      |                                                                                                                      |
|------------|------|----------------------------------------------------------------------------------------------------------------------|
| L13218.1   | 3356 | AACGAUCUACGCUCCGAUUCAGCUCCAAGACGUAUACCAAGUACGUAAGAGGAUCCAGUGCCAGGGAGCAUAUAUGCAGUCUUUAAGUUCUUCAGAACCAAGGCCUGGGAGGCACG |
| AF525216.1 | 3356 | .....C.....G...A.....C.....U.....U.....AU...                                                                         |
| DQ238861.1 | 3359 | .....G...A.....C.....U.....U.....AU...                                                                               |
| CAT        | 3358 | ..A.....C.....C...G.....C.....C...C..U.....G.....                                                                    |
| HP         | 3359 | .....C.....G...A.....C.....U.....U.....A...                                                                          |
| P2MER      | 3359 | .....C.....A.....A.....C.....U.....U.....                                                                            |
| J1710_A    | 3359 | .....C.....G...A.....C.....U.....U.....U.....A...                                                                    |

|            |      |                                                                                                                          |
|------------|------|--------------------------------------------------------------------------------------------------------------------------|
| L13218.1   | 3476 | UGCGCUUAAGUCCUACAAAGUCAGGUUCCAAGAUCCCAAGCCACAUAGUGAUUAGUGAGUUGAAAGAGAGAGCGGGCAGAGAAGCUAUAUCGGGUCGAGGGGUUAUGUCGAUACAGGUUU |
| AF525216.1 | 3476 | ..A.....U.....C.A.....U.....                                                                                             |
| DQ238861.1 | 3479 | ..A.....U.....C.A.....U.....                                                                                             |
| CAT        | 3478 | ...UC.....A.....C.....                                                                                                   |
| HP         | 3479 | ..A.....U.....C.A.....U.....                                                                                             |
| P2MER      | 3479 | .....U.....C.A.....U.....                                                                                                |
| J1710_A    | 3479 | ..A.....U.....C.A.....U.....                                                                                             |

|            |      |                                                                                                                             |
|------------|------|-----------------------------------------------------------------------------------------------------------------------------|
| L13218.1   | 3596 | UAAGGCUUUGGACAUUUAUUAAGAUAUUCUUUCCCAAUUGGAGCUGCCAAAGUACAUAACACGAGUUCUAAUUUUUACUCAGAGGCAAGGUGUGUGAAGUCUCGAGGUUGUACAAGAAGGA   |
| AF525216.1 | 3596 | .....G.....U.....                                                                                                           |
| DQ238861.1 | 3599 | ....G.....A..G.....U.....                                                                                                   |
| CAT        | 3598 | .....U.....U.....AG.....U.....G.....                                                                                        |
| HP         | 3599 | .....G.....U.....                                                                                                           |
| P2MER      | 3599 | .....G..C.....U.....                                                                                                        |
| J1710_A    | 3599 | .....G.....U.....                                                                                                           |
| L13218.1   | 3716 | ACAGGUAAUUCGUAAAUUUACUAAACCGUAUUCUCUGAGCUCACAGCCAUAGUCCGCCAUAGAGGUAAACAAGUCCACGGGGUCGAUGGGGAGGAUGUGGACUUUGUUAUCAGACUUCGAGAC |
| AF525216.1 | 3716 | .....A.....C.....U.....                                                                                                     |
| DQ238861.1 | 3719 | .....A.....C.....U.....U.....                                                                                               |
| CAT        | 3718 | .....U.....C.....C.....A.....                                                                                               |
| HP         | 3719 | .....C.....U.....                                                                                                           |
| P2MER      | 3719 | .....C.....U.....                                                                                                           |
| J1710_A    | 3719 | .....C.....U.....                                                                                                           |
| L13218.1   | 3836 | CUUGCUUGGGAAGGUGAGCUAUAAAGAACCCGAGUAUCAUUGAGGAGCAGGUUGUUCCUGGCUAACCUCAGACCCUAUACCACGUACCCCGACUUCUACUCUACAUAUUUCAAGACGGC     |
| AF525216.1 | 3836 | .C.....U.....U.....G.....U.....                                                                                             |
| DQ238861.1 | 3839 | .C.....G.....U.....U.....G.....U.....                                                                                       |
| CAT        | 3838 | .C.....A.....G.....                                                                                                         |
| HP         | 3839 | .C.....U.....U.....G.....                                                                                                   |
| P2MER      | 3839 | .C.....C.....U.....U.....G.....                                                                                             |
| J1710_A    | 3839 | .C.....U.....U.....G.....                                                                                                   |
| L13218.1   | 3956 | UGUCCAGUUUAUGCACAGGACAUUCGUUCCCGUCACUCUCAGAAGUGCCCCUCCGUUAAACAUUUCACGAGUACUGUGGGAGGCCGAGCUCUGGGGAACCACGGGAUCCGGCUACAUCGG    |
| AF525216.1 | 3956 | G..U.....U.....U.....C.....U.....                                                                                           |
| DQ238861.1 | 3959 | G..U.....C.....U.....U.....C.....U.....                                                                                     |
| CAT        | 3958 | G.....U.....U.....CU.....U.....                                                                                             |
| HP         | 3959 | G..U.....U.....C.....                                                                                                       |
| P2MER      | 3959 | G..U.....U.....C.....                                                                                                       |
| J1710_A    | 3959 | G..U.....U.....C.....                                                                                                       |
| L13218.1   | 4076 | CUAUGGCAAGCGUAGUUUUAACAAAUGGUCGAUCUACGGAGCUUAUCCUACCGAGGAGAUUUUACGGCUAGCACUCUAUGGAGAUAAUCCACCCCUCAAGCCGCUGGAAAAACCCGAACU    |
| AF525216.1 | 4076 | .....C.....C.....C.....                                                                                                     |
| DQ238861.1 | 4079 | .....C.....C.....C.....                                                                                                     |
| CAT        | 4078 | .....C.....C.....CU..G.....U.....                                                                                           |
| HP         | 4079 | .....C.....C.....G.....CU..G.....U.....                                                                                     |
| P2MER      | 4079 | ..C.....C.....C.....G.....CU..G.....U.....                                                                                  |
| J1710_A    | 4079 | .....C.....C.....G.....CU..G.....U.....                                                                                     |
| L13218.1   | 4196 | UACGAAGGUACGUGCUGUAAUCUCCGCCUCCCUCCAUCGUAUAUAUUGAUGUCUUACCUCGAGUACAUCAUGGCAGACACCAUAGUUGACAAAGCAUUCACUACAACUCUGAUGAACGA     |
| AF525216.1 | 4196 | .....C.....C.....C.....U.....                                                                                               |
| DQ238861.1 | 4199 | .....UU.....C.....C.....U.....                                                                                              |
| CAT        | 4198 | .....UU.....C.....A.....A.....                                                                                              |
| HP         | 4199 | .....UU.....C.....C.....                                                                                                    |
| P2MER      | 4199 | .....UU.....C.....C.....                                                                                                    |
| J1710_A    | 4199 | .....UU.....C.....C.....                                                                                                    |

|            |      |                                                                                                                           |
|------------|------|---------------------------------------------------------------------------------------------------------------------------|
| L13218.1   | 4316 | CAGGCAGCUAGAGAACCUUGAGCGCCACAUGAUGACCAUGACCGGAGGAGUCAGGGUUCAGUGGACCAGUCCAUUUUUAUCGCCAGCCUGACUUGGUCCAAAUAGGCAUCUGGCAACA    |
| AF525216.1 | 4316 | .....U.....U.....                                                                                                         |
| DQ238861.1 | 4319 | .....UAU.....G.....U.....                                                                                                 |
| CAT        | 4318 | .....                                                                                                                     |
| HP         | 4319 | .....U..... <b>M</b> .....C.....                                                                                          |
| P2MER      | 4319 | .....U.....C.....C.....                                                                                                   |
| J1710_A    | 4319 | .....U.....U.....C.....                                                                                                   |
|            |      |                                                                                                                           |
| L13218.1   | 4436 | GUUACUGUUUACACUGGCAUCUGCGUCAGCUCCGUACAGAGCCCGCGACAGUGUCUCAUUAGUCAUAUCACGUUUAGCUUACUACGACUUUCCCAAACCUAAAGGUACGGAUGUCGGA    |
| AF525216.1 | 4436 | .....A.....A.....C.....G.....C.....C.....C.....G.....                                                                     |
| DQ238861.1 | 4439 | .....A.....A.....C.....G.....C.....C.....C.....G.....                                                                     |
| CAT        | 4438 | .....C.....A.....C.....C.....AG.....C.....U.....A.....C.....G.....A.....                                                  |
| HP         | 4439 | .....A.....C.....G.....C.....C.....C.....G.....                                                                           |
| P2MER      | 4439 | .....A.....C.....G.....C.....C.....C.....G.....                                                                           |
| J1710_A    | 4439 | .....A..... <b>K</b> .....C.....G.....C.....C.....G.....                                                                  |
|            |      |                                                                                                                           |
| L13218.1   | 4556 | CGGUGACAAACGUGUGCUACACGGCCUCCCCUCGGGGUGGAAGUGGACCGCUCUGCUAGGGGCUCAUCAUCAAUGUGACACAAUUUAACCAUGGCGGAAUUGUCCAACACUCUGGCCUC   |
| AF525216.1 | 4556 | .....U.....U.....G.....C.....                                                                                             |
| DQ238861.1 | 4559 | .....U.....G.....U.....G.....C.....                                                                                       |
| CAT        | 4558 | .....A.....U.....                                                                                                         |
| HP         | 4559 | .....U.....C.....A.....                                                                                                   |
| P2MER      | 4559 | .....U.....T.....C.....A.....                                                                                             |
| J1710_A    | 4559 | .....U.....C.....A.....                                                                                                   |
|            |      |                                                                                                                           |
| L13218.1   | 4676 | GUUGAGGUCAACGGUGGUGCAGGGCGACGAUAUCGCUCUAAGUAUGACUGACCGGGAGCAGGCCACACAGUUAGUUGACACUUAUGCACGUCAGGGGUUCGAGGUCAACCCGAAGAAGUU  |
| AF525216.1 | 4676 | .....A.....A.....                                                                                                         |
| DQ238861.1 | 4679 | .....A.....A.....C.....G.....                                                                                             |
| CAT        | 4678 | .....G.....                                                                                                               |
| HP         | 4679 | .....A.....G.....A.....                                                                                                   |
| P2MER      | 4679 | .....A.....A.....G.....A.....                                                                                             |
| J1710_A    | 4679 | .....A.....G.....A.....                                                                                                   |
|            |      |                                                                                                                           |
| L13218.1   | 4796 | CUGGAUAUCACCCGACCGGGACGAAUUCUUCGGAGGGUAGCAACCCCUUGGUUAUAGUCGCGGGGUACCCAGCUAGAAUGAUGAUUAAAUUGUUAUAUCAGCUGACGGAACCUGAAGAGCC |
| AF525216.1 | 4796 | .....C.....U.....                                                                                                         |
| DQ238861.1 | 4799 | .....C.....U.....                                                                                                         |
| CAT        | 4798 | .....C.....A.....A.....                                                                                                   |
| HP         | 4799 | .....C.....                                                                                                               |
| P2MER      | 4799 | .....C.....                                                                                                               |
| J1710_A    | 4799 | .....C.....                                                                                                               |
|            |      |                                                                                                                           |
| L13218.1   | 4916 | CUCACACUACAUCUCCAUGUUGCCAAAGUUAGCGAAGGUGCCUAACGUGGUCCAGGAGCAUGUAAAGCCCCGGUCUGAUGUGCCAUGGUCGGAGACCGUCGAAGAACUUGAUUGGCGCGCA |
| AF525216.1 | 4916 | .....C.....A.....G.....U.....GC.....                                                                                      |
| DQ238861.1 | 4919 | .....C.....A.....G.....U.....GC.....                                                                                      |
| CAT        | 4918 | U.....C.....C.....G.....U.....GC.....                                                                                     |
| HP         | 4919 | .....C.....A.....G.....U.....GC.....                                                                                      |
| P2MER      | 4919 | .....C.....A.....G.....U.....GC.....                                                                                      |
| J1710_A    | 4919 | .....C.....A.....G.....U.....GC.....                                                                                      |

|            |      |                                                                                                                           |
|------------|------|---------------------------------------------------------------------------------------------------------------------------|
| L13218.1   | 5036 | AGCUCUCGCUAUACUGAGGCAUAGGCCUGCCCGUACGUCAGAACUGGUGACUCAAUGGCUGCAACUGAUUGGUAGGUUUACAGCUGCUCAUCCAGAUAAAGCGAGCCUUAACUCUUCUCUA |
| AF525216.1 | 5036 | .....A.....U.....U..                                                                                                      |
| DQ238861.1 | 5039 | .....A.....U.....U..                                                                                                      |
| CAT        | 5038 | .....C.....C.....U..                                                                                                      |
| HP         | 5039 | .....U..C.....U..                                                                                                         |
| P2MER      | 5039 | .....U.....U.....U..                                                                                                      |
| J1710_A    | 5039 | .....R.....U..C.....U..                                                                                                   |
|            |      |                                                                                                                           |
| L13218.1   | 5156 | CCGUUGGUUCGUGAGAGAUUUGACACAUGCUACAAAAUAAAAAAAAAGAAUUCUUCUGGUCCUGUUACAGCAGCCGGGCUUCUGGGGGGUUAUUCCAGAGCCUGGUUGGCUGUUUAAAG   |
| AF525216.1 | 5156 | ..A.....C.....G.....A.....                                                                                                |
| DQ238861.1 | 5159 | ..A.....C.....G.....A.....                                                                                                |
| CAT        | 5158 | .....A.....                                                                                                               |
| HP         | 5159 | ..A.....A.....A.....                                                                                                      |
| P2MER      | 5159 | ..A.....A.....A.....                                                                                                      |
| J1710_A    | 5159 | ..A.....A.....A.....                                                                                                      |
|            |      |                                                                                                                           |
| L13218.1   | 5276 | GACCACUCACCUCGCGAGAUUGAUAGUUAGCGAACUAGACAUAGGACUGCCAGGUCCUGGGCCACGUCUAGUCGCUUUGGGACAUCCCCUACCUCACUGGCCCCGCACUACCUCACUCU   |
| AF525216.1 | 5276 | .....A.....U.....                                                                                                         |
| DQ238861.1 | 5279 | .....A.....U.....                                                                                                         |
| CAT        | 5278 | .....U..G.....                                                                                                            |
| HP         | 5279 | .....G.....U.....                                                                                                         |
| P2MER      | 5279 | .....G.....U.....                                                                                                         |
| J1710_A    | 5279 | .....G.....U.....                                                                                                         |
|            |      |                                                                                                                           |
| L13218.1   | 5396 | GAUAGUUCGAGUAGCGUGCAUGUGCAGUCGCAAAAGGAAUUGGAUUUGUGGGGGCUGUGCAGAUCCAGUAAAUAUGCUAAGCACUAUUAACAUAUUUCGAUACUACAAACUGACUCU     |
| AF525216.1 | 5396 | .....C.....U.....                                                                                                         |
| DQ238861.1 | 5399 | .....C.....U.....                                                                                                         |
| CAT        | 5398 | .....C.....A.....C.....                                                                                                   |
| HP         | 5399 | .....C.....U.....                                                                                                         |
| P2MER      | 5399 | .....C.....C.....                                                                                                         |
| J1710_A    | 5399 | .....C.....U.....                                                                                                         |
|            |      |                                                                                                                           |
| L13218.1   | 5516 | UCCUACGUUGGUGCUUUGGGCCCAACGGCUAGGUGAUAAACACGUCACCGAUUUCAUUAAGAUUCUGUCACCCUGGGUUCAGAAAUACCAAAUAUGACCCGCAUGCGCGUCUAUUCACAAG |
| AF525216.1 | 5516 | .....A.....                                                                                                               |
| DQ238861.1 | 5519 | .....A.....                                                                                                               |
| CAT        | 5518 | C.....C.....C.....A.....                                                                                                  |
| HP         | 5519 | .....A.....                                                                                                               |
| P2MER      | 5519 | .....A.....                                                                                                               |
| J1710_A    | 5519 | .....R.....A.....                                                                                                         |
|            |      |                                                                                                                           |
| L13218.1   | 5636 | UAACGGGGUGUCAGUAGGAAUGUUAUAAGGAUAAGAGUACGACAUUUUACCCACAGAGUGCUUCGAAGAGAGACACCUAAGUGUAUCCCCGUAAUCGUCGGGCUAUAUCGGGAGCAGAC   |
| AF525216.1 | 5636 | .....C.....                                                                                                               |
| DQ238861.1 | 5639 | .....C.....C.....                                                                                                         |
| CAT        | 5638 | .....C.....                                                                                                               |
| HP         | 5639 | .....C.....                                                                                                               |
| P2MER      | 5639 | .....C.....                                                                                                               |
| J1710_A    | 5639 | .....C.....                                                                                                               |



|            |      |                                                                                                                       |
|------------|------|-----------------------------------------------------------------------------------------------------------------------|
| L13218.1   | 5756 | ACUAUCCGUUCCGAGAGUGUUCGUCUAUCGGAACCGACAAAAUACUUAUUAAGCCUACAACGGGCGUCGGGUUACUCACUGAAUCUAGUUAAGAAGAUUUACAGAUACUAGGAAACC |
| AF525216.1 | 5756 | .....G.....C.....G.....                                                                                               |
| DQ238861.1 | 5759 | .....G.....C.....G.....                                                                                               |
| CAT        | 5758 | .....G.....C.....G.....G.....                                                                                         |
| HP         | 5759 | .....G.....C.....G.....                                                                                               |
| P2MER      | 5759 | .....G.....C.....G.....                                                                                               |
| J1710_A    | 5759 | .....G.....C.....G.....                                                                                               |

|            |      |                                                                                                                         |
|------------|------|-------------------------------------------------------------------------------------------------------------------------|
| L13218.1   | 5876 | AGUGGACCAUCCGGUGGACGCGAGGUUCUCACAGGCAUCCCCAACAACUGGAGCGACUUGGCUAGAACGGCUGGCACCUUUUUGUUGACUGUACCGGCUUAGGAGGUUUCAGGAGACAA |
| AF525216.1 | 5876 | .....A.....                                                                                                             |
| DQ238861.1 | 5879 | .....A.....A.....                                                                                                       |
| CAT        | 5878 | .....U.....U.....                                                                                                       |
| HP         | 5879 | .....A.....                                                                                                             |
| P2MER      | 5879 | .....U.....A.....                                                                                                       |
| J1710_A    | 5879 | .....A.....                                                                                                             |

|            |      |                                                                                                                           |
|------------|------|---------------------------------------------------------------------------------------------------------------------------|
| L13218.1   | 5996 | UGCUGACCUUGUGCCUGAGCGUUUGGGCUUCAACCAUAGCAGCUGGCCUUCACGCAAUUUUUAGGUCAAGGAAAUUUCUCCUUUGCGUAGUAGCAUAGCUGUUCAAAGAAAGAAAAAGAAA |
| AF525216.1 | 5996 | ...AG....CG.....C.....G.....C.....AG....                                                                                  |
| DQ238861.1 | 5999 | ...AG....CG.....C.....G.....C.....AG....                                                                                  |
| CAT        | 5997 | ...G....CG.....C.....C.....AG....                                                                                         |
| HP         | 5998 | ...G....CG.....C.....G.....C.....AG....                                                                                   |
| P2MER      | 5998 | ...G....CG.....C.....G.....C.....AG....                                                                                   |
| J1710_A    | 5998 | ...G....CG.....C.....G.....C.....AG....                                                                                   |

GA (AA) deletion

|            |      |                                                                                                                          |
|------------|------|--------------------------------------------------------------------------------------------------------------------------|
| L13218.1   | 6116 | UACUGGUAAUUACCGCACACGAUCGGUGGGUCGACCAGCAUAGGGUGGUGUGCGGUUCGAGAACGGGGCUGGCCUUAGUACCGUCAUAACACCGUGACACGUGUAGAAACUGUCCCCCCU |
| AF525216.1 | 6112 | ...A.....U.....G.....C.....A.....U.....                                                                                  |
| DQ238861.1 | 6115 | ...A.....U.....G.....C.....C.....A.....G.....G.....G.....                                                                |
| CAT        | 6115 | ...A.....G.....U.....C.....                                                                                              |
| HP         | 6114 | ...A.....U.....G.....                                                                                                    |
| P2MER      | 6114 | ...A.....U.....G.....U.....                                                                                              |
| J1710_A    | 6114 | ...A.....U.....G.....                                                                                                    |

|            |      |                                           |
|------------|------|-------------------------------------------|
| L13218.1   | 6236 | GUAGACUCCGUUGCCUGUAGGAGGCAGCGUACGAGGGGUCG |
| AF525216.1 | 6232 | .....G.....                               |
| DQ238861.1 | 6235 | .....                                     |
| CAT        | 6235 | .....                                     |
| HP         | 6234 | .....                                     |
| P2MER      | 6234 | .....                                     |
| J1710_A    | 6234 | .....                                     |
