# Supplementary material for: Re-Discovery of Giardiavirus: Genomic and Functional Analysis of Viruses from Giardia duodenalis Isolates
Source: MDPI journal article supplement (doi:10.3390/biomedicines9060654), 2021-06-08
Supplement: s1 [file s1]

A

>CP\_P2MER (55% sequence coverage from trypsin digestion)

|            |             |             |             |                |             |            |            |            |             |     |
|------------|-------------|-------------|-------------|----------------|-------------|------------|------------|------------|-------------|-----|
| LAPENITFDT | LNTQNDHEET  | YGESPEVPKA  | SIAPAGRQNV  | PVLQQNQENE     | DDHALGGSSED | AKDEREIQFS | AIKTLYNYYS | EGPSTPIMPH | LVNRLRGLDA  | 100 |
| LAKVDATLSK | VDMNAAYIFA  | LRPTFPYSYG  | YKQRFSNRRL  | TTSALCYART     | GLSSFLTVDK  | TYTSNSPLRG | GSRGWPIFNV | GVSPHVAEPH | MRTLSPIGLE  | 200 |
| VFNLATSQFS | KTLLTASSKV  | FTQSLYSADI  | LSIFGEVFLP  | HVMQPVSNYT     | PILVRALLAL  | IHILGSGSGN | CSLSSSIFES | SIPQFLTISH | STNMSNRTRY  | 300 |
| CLHTWSAYKD | MFRNGIP PQS | TFPPTLAPEG  | SSARILIPAA  | LVTSPMFPWL     | LVLVSSG PQF | FLYSKDASSN | TVDIGSRGRI | TSPIPDVAHL | DLHRLWNLFR  | 400 |
| FDGYRYIDVV | IVGVDRDYVW  | PYQNGVYVHG  | GKGPKGTDNY  | [G/E]NADVHDGIG | TIFSSFNDNV  | NVQTSDLLLG | LSTLWNHITT | TYATEEEVMT | AIKIAAAFAL  | 500 |
| VYPVQPIVYS | GCPRALYNHT  | SYFQPSSENC  | YT TDTAEVKS | TWDTVELSVQ     | VNNAMVLGMT  | LPFGQPTVSS | LPFGQPTVSS | EISMFKVGNL | PLQNL DYLSL | 600 |
| DMMEFYAPTT | GQLYDIRSDS  | LISSAHR TVN | LGIGYTALAD  | FFAYLASVPA     | QSFYHNRMT   | SPISKQAYSV | SPISKQAYSV | DFVGWDRCDL | FNLD TLLGAK | 700 |
| RIAGVASSLI | PWHCSLQRCF  | LPIIMHYTGL  | HFGQEHIVR   | DVAGVEGLQQ     | IVLRNDQ GSI | VLDALGTAAP | VLDALGTAAP | RLSAWYSDTT | CAIPLSDRVM  | 800 |
| EIVNYAAIWD | PTQERRATGF  | VYTYFSPNFL  | SSFNVSEPIF  | NKTINLT PPY    | DDTSQTVIQN  | LSMPQMLSFD | LSMPQMLSFD | SADNEWVPTS | GPAWKVPYLE  | 900 |
| NVVKRSGRRL | LAELRIASNN  | GSGDRTF LDD | V           |                |             |            |            |            |             | 931 |

B

>CP/RdRp\_HP (19% sequence coverage combined from trypsin and AspN digestion)

|             |             |             |             |             |             |             |                |             |                |      |
|-------------|-------------|-------------|-------------|-------------|-------------|-------------|----------------|-------------|----------------|------|
| LA PENITFDT | LNTQNDHEET  | YGESPEVPKA  | SIAPAGRQNV  | PVLQQNQENE  | DNHALGGSSED | AKDEREIQSS  | AIKTLYNYYS     | EGPSTPIMPH  | LVNRLRGLDA     | 100  |
| LAKVDATLSK  | VDMNAAYIFA  | LRPTFPYSYG  | YKQRFSNRRL  | DNHALGGSSED | GLSSFLTVDK  | TYTSNSPLKG  | GSRGWPIFN[V/L] | GVSPHVAEPH  | MRTLSPIGLE     | 200  |
| VFNLATSQFS  | KTLLTASSKV  | FTQSLYTADI  | LSIFGEVFLP  | TTSALCYART  | PILVRALLAL  | IHILGSGSGN  | CSLSSSIFES     | SIPQFLTISH  | STNMSNRTRY     | 300  |
| CLHTWSAYKD  | MFRNGIP PQS | TFPPTLAPEG  | SSARILIPAA  | GLSSFLTVDK  | LVLVSSG PQF | FLYSKDASIN  | TVDIGSRGRI     | TSPIPDVAHL  | DLHRLWNLFR     | 400  |
| FDGYRYIDVV  | IVGVDRDYVW  | PYQNGVYVHG  | GKGPKGTDNY  | HVMQPVSNYT  | TIFSSFNNNV  | NVQTSDLLLG  | LSTLWNHITT     | TYATEEEVMT  | AIKIAAAFAL     | 500  |
| VYPVQPIVYS  | GCSRALYNHT  | SYFQPSSENC  | YT TDTAEVKS | PILVRALLAL  | VNNAMVLGMT  | LPFGQPTVSS  | AQWFNNIDKA     | EISMFKVGNL  | PLQNL DYLSL    | 600  |
| DMMEFYAPTT  | GQLYDIRSDS  | LISSAHR TVN | LGIGYTALAD  | LVTSPMFPWL  | QSFYHNRMT   | SPISKQAYSV  | YERFIERFID     | DFVGWDRCDL  | FNLD TLLGAK    | 700  |
| RIAGVASSPI  | PWHCSLQRCF  | LPIIMHYTGL  | HFGQEHIRVR  | LVLVSSG PQF | IVLRNDQ GSI | VLDALGTAAP  | SRLAVKLDWS     | RLSAWYSDTT  | CAIP[I/L]SDRVM | 800  |
| EIVNYAAIWD  | PTQERRATGF  | VYTYFSPNFL  | SSFNVSEPIF  | ENADVHDGIG  | DDTSQTVIQN  | LSMPQMLSFD  | PYYESTFYVV     | SADNEWVPTS  | GPAWKVPYLE     | 900  |
| NVVKRSGRRL  | LAELRIASNN  | GSGDRTF LTT | CKTRKGRHYA  | TIFSSFNNNV  | LEFVCAPLSS  | ISLQGGQTIY  | APIQLQDAIP     | VRREDPVPGS  | IYAVFKFFSE     | 1000 |
| PKAWETRALK  | SYKVRFQDLP  | SHIVISELKE  | RAARSYIGSR  | TWDTVELSVQ  | DIYIDILSQM  | ELPKYIHEFL  | VLLRGKVCEV     | SRLYKKEQVF  | VILLTVFSEL     | 1100 |
| TAIVRHRGNK  | STGSMGRMWT  | LLSDFETLLG  | KVSYKNPSII  | VNNAMVLGMT  | DPIPRTPDFY  | STYFKTAVQF  | MHRTFVPVTL     | RSAPPLTFYE  | YCARPELWGT     | 1200 |
| TGSGYIGYGK  | RSFNKWSIYG  | AYSAAEIIYRL | ALYGDNPPLK  | FFAYLASVPA  | RAVISASFQS  | YILMSYLEYI  | MADTIVDKAF     | TTTLMNDRQL  | ENLERHMMTM     | 1300 |
| TGGVRVPVDQ  | SNFDRQPDIV  | QIGIWQQLLF  | HLASASAPYR  | QSFYHNRMT   | RLASTTTFPN  | LKVRMSDGDK  | RVLHGLPSGW     | KWTALLGALI  | NVTQLLTMAE     | 1400 |
| LSNTLASLRS  | TVVQGDDIAL  | SMTDREQAAQ  | LVD TYARQGF | DVAGVEGLQQ  | PDRDEFLLRV  | ATPGIVAGYP  | ARMMIKLLYQ     | LTEPEEPSHY  | ISM[L/F]PKLAKV | 1500 |
| PNMVREYVSP  | RS DVPWSETV | EELDWREALA  | ILRHRPARTS  | IVLRNDQ GSI | GRFTA AHPDK | RALTLLYHWF  | VRDLTHATKI     | KKRNLLILLQ  | QPGFWGGY[S/P]Q | 1600 |
| SLVGLLRTTH  | LADMIVSELG  | IGLPGPRATS  | SRFGTSPTSL  | NKTINLT PPY | SSVHVQSQKE  | LDLWGLCRSS  | IYAKHYSNIF     | RYYKLTLP TL | [V/M]LWAQRLGDK | 1700 |
| HVTDFIRSVT  | LGSEIPKYDP  | HTRLFTSNGV  | SVGT LIRIRV | DDTSQTVIQN  | ETPKCIPVIV  | GLYREQT LSV | PESVRLSEPD     | KILSSLQRAS  | GYSLSLVKKI     | 1800 |
| LQITRKPVVDH | PVDAREFSQAF | PNNWSDLART  | AGTFLLTVPL  | YFSAALGGKI  | SLSVWASTIA  | AGFTQFLGQG  | NFSFA          |             |                | 1873 |

>CP/RdRp\_CAT (42% sequence coverage combined from trypsin and AspN digestion)

|                |                |             |             |             |             |             |              |                 |                 |      |
|----------------|----------------|-------------|-------------|-------------|-------------|-------------|--------------|-----------------|-----------------|------|
| MVWGTGYGNP     | SPLNPYGFAS     | LHRGGNLPLI  | LAPENITLDT  | LNTQNDYEET  | HGESPEVPKA  | SIAPAGRQNV  | PVLQQNQENK   | DNHALGGSSED     | AKDEREIRFS      | 100  |
| AIKTLYNYYS     | EGPSTPIMPH     | LVNRLRGLDA  | LAKIDATLTK  | VDMNAAYIFA  | LRPTFPYSYG  | YKQRFSNRRL  | TTSAVCYART   | GLSSFLT VNK     | TYTSNSPLKG      | 200  |
| GSRGWPIFNV     | GVSPHVAEPH     | MRTLSPIGLE  | VFNLATSQFS  | KTLLTASSKV  | FTQSLYTADI  | LSIFGEVFLP  | HVMQPVSNYT   | PILVRALLAL      | IHILGPGSGN      | 300  |
| CSLSSSIFES     | SIPQFFT VSH    | STNMSNRTRY  | CLHTWSAYKD  | MFRNGIP PQS | TLPPTLAPEG  | SSARVLIPAA  | LVTSPMFPWL   | LALVSSG PQF     | FLYSKDASIN      | 400  |
| TVDIGSRGRI     | TSPIPDVANL     | DLHRLWNLFR  | FDGHR YIDVV | IVGVDRDYVW  | PYQNGVYVHG  | GKGPNGTDNY  | GNADVHDGIG   | TIFSSFNDNV      | NVQTSDLILG      | 500  |
| LLTLWNHITT     | TYATEEEVMT     | AIKIAAAFAL  | VYPVQPIVYS  | GCPRAFQ SHT | SYYQPSSENC  | YT TDTAEVKS | TWDTVELSVQ   | VNNAMVLGMT      | LPFGQPTVSS      | 600  |
| AQWFNNIDKA     | EISMFKVGNL     | PLQNL DYLSL | DMMEFYAPTT  | GQLYDIRSDN  | LILSAHR TVN | LGIGYTALAD  | FFAYLASVPA   | QSFYHDMVT       | SPISKQTYSV      | 700  |
| YERFIERFVD     | DFVGWDRCDL     | FNLD TLLAAK | RIAGVASSPI  | PWHCSLQRCF  | LPIIMHYTGL  | HFGQEHITVR  | DVAGVEGLQQ   | IVMRNDQ GKI     | VVDALGTAAP      | 800  |
| SRLAVKLDWS     | RLSAWYSDTT     | CAIPLSDRVM  | EIINYAAIWD  | PTQERRATGF  | VYTYFSPNFL  | SSFNASEPIF  | NTSINLT PPY  | DDTSYTVIQN      | LSMPQMLSFD      | 900  |
| PYYESTFYVV     | SADNEWIPTS     | GPAWKVPYLE  | NVVKRSGRRL  | LAELRIASNN  | GSGDRTF LTT | CKTRKGRHYA  | YFSAALGGKI   | LEFICAPLSS      | ISLQGGQTIY      | 1000 |
| APIQ[L/F]QDAIP | ARREDPVPGS     | IYAVFKLFSE  | PKAWEARASK  | SYKVKFQDLP  | SHIVINELKE  | RAARSYIGSR  | GYVDTGFKAL   | DIYIDILSQM      | ELPKYIHEFL      | 1100 |
| ILLKGVKCEV     | SRLYRKEQVF     | VILLTVFSEL  | TAIVRHRGNK  | STGSMGRMWT  | LLSDLETLLG  | KVSYKNPSII  | EEQVVPWLTS   | DPIPRTPDFY      | STYFKTAVQF      | 1200 |
| MHRTFVPVIL     | RSAPPLTF[H/Y]E | YCGRPELWGT  | TGSGYIGYGK  | RSFNKWSIYG  | AYSAAEIIYRL | ALYGDNPPLK  | PLEKPELT KV  | RAVISASFQS      | YILMSYLEYI      | 1300 |
| MADTIVDKTF     | TTTLMNDRQL     | ENLERHMMTM  | TGGVRVPVDQ  | SNFDRQPDIV  | QIGIWQQLLF  | HLASASAPHK  | ARDSVSLVIS   | RLVSTTTFPN      | LKVRMSDGDK      | 1400 |
| RVLHGLPSGW     | KWTALLGALI     | NVTQLLTMAE  | LSNTLASLRS  | TVVQGDDIAL  | SMTDREQAAQ  | LVD TYARQGF | EVNPKKFWIS   | PDRDEFLLRV      | ATPGIVAGYP      | 1500 |
| ARMMIKLLYQ     | LTEPEEPSHY     | ISTLPK LAKV | PNVVQEYVSP  | RS DVPWSETV | EELDWREALA  | ILRHRPARTS  | ELVTQWLQLI   | GRFTA A[H/Y]PDK | RALTLLYRWF      | 1600 |
| VRDLTHATKI     | KKRNLLVLLQ     | QPGFWGGYSQ  | SLVGLLRTTH  | LADMIVSELD  | IGLPGPRATS  | SRFGTSPTSL  | APHYLT L IVP | SSVHVQSQKE      | LDLWGLCKSS      | 1700 |
| TYAKHYSNIF     | RYYKLTLP TL    | VLWAQRLGDK  | HVTDFIRSVT  | PGSEIPKYDP  | HTRLFTSNGV  | SVGT LIRIRV | RHFTHRVLRR   | ETPKCIPVIV      | GLYREQT LSV     | 1800 |
| PESVRLSEPD     | KILSSLQRAS     | GYSLSLVKKI  | LQITRKPVVDH | PVDAREFSQAF | PNNWSDLART  | AGTFLLTVPL  | RRFQETMLAL   | SLSVWASTIA      | AGFTQFLGQGNFSFA | 1904 |
