# Supplementary material for: Re-Discovery of Giardiavirus: Genomic and Functional Analysis of Viruses from Giardia duodenalis Isolates
Source: MDPI journal article supplement (doi:10.3390/biomedicines9060654), 2021-06-08
Supplement: s1 [file s1]

## Supplemental Figure Captions

**Figure S1 Multiple sequence alignment of GLV genomes.** The consensus genome sequences of the sequenced GLV strains (HP; CAT; P2MER and J10/17\_A) were aligned with the GLV genomes available in GenBank (L13218.1; AF525216.1; DQ238861.1) using Clustal X software. Sequence gaps are grey boxed. Nucleotide insertion (compared to reference sequences) in the HP, CAT, P2MER and J10/17\_A are black boxed, whereas heterogeneous nucleotide positions are in bold and white boxed. Heterogeneous positions are indicated following the IUPAC nomenclature. Relevant stop codons (red) are marked and self-explained. The original -1 ribosomal frameshift heptamer (green) and the proposed +1/-2 ribosomal frameshift sequence (pink) are marked.

**Figure S2. Phylogenetic analysis GLV strains.** A) Left, unrooted cladogram of the viral genomes obtained from *G. duodenalis* isolates. Bootstrap values are indicated next to each branch point. Right, pairwise comparison table of the viral genomes obtained from *G. duodenalis* isolates. Number of different nucleotides and percentage of identity are shown. Lower values are highlighted in dark violet, higher values are highlighted in dark red. B) Left, unrooted cladogram of the deduced amino acid sequences of the viral capsid protein (ORF1); right, corresponding pairwise comparison table. C) Left, unrooted cladogram of the deduced amino acid sequences of the viral RNA-dependent RNA polymerase (ORF2); right, corresponding pairwise comparison table. Bootstrap values in the cladograms are indicated next to each branch point. In pairwise comparison tables, number of different amino acids and percentage of identity are shown. Lower values are highlighted in dark violet, higher values are highlighted in dark red.

**Figure S3. Multiple alignment of the CP (ORF1) amino acid sequences.** Light blue arrow indicates the portion of the protein used for 3D structure prediction, and red portion indicates region of higher sequence divergence between CAT and HP (see Figure 3). Dark grey boxed sequences were omitted for the CP phylogenetic analysis (see Figure 3). Alternative amino acid positions, as inferred from sequencing of the viral genomes, are in square brackets [] and black boxed when confirmed by mass spectrometry (see Figure 3). Note that residues Ile and Leu cannot be distinguished from each other in mass spectrometry.

**Figure S4. Multiple alignment of the RdRp (ORF2) amino acid sequences.** Only the protein region encoded after the proposed ribosomal frameshift site was aligned. Alternative amino acid positions, as inferred from sequencing of the viral genomes, are light grey boxed and in square brackets []. Conserved motifs within the RdRp sequences [46] are black boxed. Dark grey boxed sequences were omitted for the RdRp phylogenetic analysis (see Figure 3). Alternative amino acid positions, as inferred from sequencing of the viral genomes, are in square brackets [] and black boxed when confirmed by mass spectrometry (see Figure 3). Note that residues Ile and Leu cannot be distinguished from each other in mass spectrometry.

**Figure S5. Circular tree graphical view.** BLAST pairwise alignment between the JA1710\_B putative viral RNA-directed RNA-polymerase domain (yellow highlighted sequence in Figure 1 panel C) and the non-redundant protein sequence database (setting: Tree method is neighbor joining; Max Seq Difference is 0.85; Evolutionary distance model is Grishin). Sequences are labelled according to the common names (as reported in Supplemental Excel File 1).

**Figure S6 Pseudoknots prediction in the GLV 5'-UTR.** Dot-bracket representation (Vienna format) of the maximum expected accuracy (MEA) of RNA structure and pseudoknots prediction by IPknot web server (Version 1.3.1) of the 5'-UTR region (nucleotide 120-501) of GLV<sub>HP</sub>, GLV<sub>CAT</sub> and reference GLV L13218.1 genome by IPknot web server (Version 1.3.1) (Scoring model: CONTRAfold model; With refining parameters; Weight for true base pairs: Level 1: 2; Level 2: 16; Level 3: 16) and used for the force directed graph layout of Figure 2.

**Figure S7. Mass spectrometry analysis of CP proteins of GLV<sub>HP</sub> and GLV<sub>CAT</sub> strain.** A) Deduced amino acid sequences, as inferred from sequencing of the viral genomes, are shown. Sequences represented in the peptides

recovered from LC MS/MS after trypsin or chymotrypsin cleavage of viral proteins are indicated (yellow boxed). Alternative aminoacid positions are in square brackets [ ] and grey boxed when confirmed by mass spectrometry. Note that residues Ile and Leu cannot be distinguished from each other in mass spectrometry. B) MS/MS spectrum of the triple charged CP GLV<sub>HP</sub> peptide (3-29) derived from tryptic digestion. The ion at m/z 1035.47 was fragmented and b- and y-series ions are shown in red and blue, respectively. Neutral losses from the precursor ion are shown as green peaks and internal fragments are reported in yellow. The sequence of the peptide matching the fragments detected in the MS/MS spectrum is reported in the panel: the dark lines define the fragments of the b- or y- series ion detected in the MS/MS spectrum. C) MS/MS spectrum of the triple charged CP GLV<sub>CAT</sub> peptide (33-59) derived from digestion with trypsin. The ion at m/z 1024.48 was fragmented and b- and y-series ions are shown in red and blue, respectively. Neutral losses from the precursor ion are shown as green peaks and internal fragments are reported in yellow. The sequence of the peptide matching the fragments detected in the MS/MS spectrum is reported in the panel: the dark lines define the fragments of the b- or y- series ion detected in the MS/MS spectrum. D) MS/MS spectrum of the triple charged CP GLV<sub>CAT</sub> peptide (33-67) derived from propionylation and tryptic digestion. The precursor ion at m/z 1302.63 was fragmented and b- and y-series ions are shown in red and blue, respectively. The MS/MS spectrum is assigned to the peptide 33-67 propionylated at the N-terminus and at lysine 59.

**Figure S8. Mass spectrometry analysis of heterologous position of the GLV<sub>HP</sub> CP.** A) and B) MS/MS spectrum of the triple charged CP- GLV<sub>HP</sub> peptide (174-185) derived from tryptic digestion. Two ions at m/z 662.35 and 655.34 (A and B, respectively) were detected and fragmented: b- and y-series ions are shown in red and blue, respectively. The masses and fragmentation patterns allow to localize a Leu (A) and a Val (B) in position 180. C) and D) MS/MS spectrum of the double charged CP-HP peptide (515-539) derived from tryptic digestion. Two ions at m/z 976.44 and 967.43 (A and B, respectively) were detected and fragmented: b- and y-series ions are shown in red and blue, respectively. The masses and fragmentation patterns allow to localize an AspN (A) and a Ser (B) in position 518. E) and F) MS/MS spectrum of the double charged CP-HP peptide (678-686) derived from tryptic digestion. Two ions at m/z 606.30 and 635.30 (A and B, respectively) were detected and fragmented: b- and y-series ions are shown in red and blue, respectively. The masses and fragmentation patterns allow to localize a Gly (A) and an Asp (B) in position 686. In all panels, precursor ions and neutral loss from them are shown as green peaks and internal fragments are reported in yellow. The sequence of the peptide matching the fragments detected in the MS/MS spectrum is reported in the panel.

**Figure S9 Mass spectrometry analysis of CP from GLV<sub>P2MER</sub> (A) and CP/RdRp proteins GLV<sub>HP</sub> and GLV<sub>CAT</sub> (B) strains.** Precursor sequences, as inferred from sequencing of the viral genomes, are shown. Sequences represented in the peptides recovered from LC MS/MS after trypsin or chymotrypsin cleavage of viral proteins are indicated (yellow boxed). Alternative aminoacid positions are in square brackets [ ]. Note that residues Ile and Leu cannot be distinguished from each other in mass spectrometry. Phenylalanine and Leucine residue at the junction between the CP and RdRp are black boxed.

**Figure S10 Virtual modelling of GLV<sub>HP</sub> and GLV<sub>CAT</sub> CP monomer** A) Representation of the capsid of *Saccharomyces cerevisiae* virus L-A (ScV-L-A), (pdb: 1m1c; monomer A light grey, monomer B dark grey). The model of CAT monomer (magenta) is superimposed to monomer A of ScV-L-A to identify the surface exposed outside the capsid. B) Surface representation of CAT, same view as a. The regions that differ significantly in sequence between CAT and HP are colored green. C) Superposition of the models CAT (magenta, green) and HP-NG (with Asn<sub>518</sub> and Gly<sub>686</sub>) (cyan). The dashed circle highlights the exposed fragment 543-553. D and E) Electrostatic surface potential of CAT and HP-NG.

## Supplemental Tables

**Table S1.** RNAseq sequencing results

|     | Yield (Mbases) | % >= Q30 | Mean Quality |
|-----|----------------|----------|--------------|
| HP  | 9.023          | 94,89    | 39,09        |
| CAT | 8.035          | 94,36    | 38,93        |

|       |       |       |       |
|-------|-------|-------|-------|
| P2MER | 8.533 | 94,8  | 39,08 |
| J1710 | 6.683 | 91,57 | 38,18 |

**Table S2.** Primer used for amplification and Sanger sequencing

| Name                                                                               | 5' -> 3' sequence           | Product Size (bp) |
|------------------------------------------------------------------------------------|-----------------------------|-------------------|
| <i>Primers used for PCR and sequencing of JA1710_B isolate</i>                     |                             |                   |
| GLV-JAC7-R*                                                                        | GCCTGTCCCGCGGGTGCTCCG       | -                 |
| GLV-JAC7-F                                                                         | AGAAGGTCTTCGGGCCACTGAGGGG   | 1026              |
| GLV-JAC7-R8                                                                        | CGAAGCCACTCCTGAAGGAGAGC     |                   |
| GLV-JAC7-F7                                                                        | GCTCTCCTTCAGGAGTGCTTCG      | 982               |
| GLV-JAC7-R7                                                                        | CTGGGCGAAGAGCCAGGC          |                   |
| GLV-JAC7-AgeF                                                                      | GAGGGTGTACCCGGTGCGGCGTTC    | 1788              |
| GLV-JAC7-TestF                                                                     | GGGGAGCTTGTAAGTGGTG         |                   |
| GLV-JAC7-NaeF                                                                      | GCCTCACTTGACAGCCGGCGTGCGCC  | 1103              |
| GLV-JAC7-F3                                                                        | CTTGAGGCCCTTGCTGGG          |                   |
| GLV-JAC7-F6                                                                        | ACACTCTCCGCGACGTGAG         | 1428              |
| GLV-JAC7-F4                                                                        | AGATGACTTCCTCAAGCCC         |                   |
| GLV-JAC7-F5                                                                        | GTACCGCTTGACCAGGGCG         | 399               |
| GLV-JAC7-intR                                                                      | CGGGGTGGAGGGCGGGCTGCG       |                   |
| <i>Primers used for PCR and sequencing of HP, CAT, P2MER and JA1710_A isolates</i> |                             |                   |
| GLV-Pst-R*                                                                         | CGACCCCTCGTACGCTGCCTCCTACAG | -                 |
| GLV-Sma-F                                                                          | GGAAGGAGTGCCAGGCCATTACC     | 3247              |
| GLV-Sac-R                                                                          | CACGTCGTCAAGAAGGTACGGTC     |                   |
| GLV-RecCp-F                                                                        | GCACCTGAAAATATTACTTTTG      | 822               |
| GLV-RecCp-R                                                                        | CGATGAAAGTGAGCAATTACC       |                   |
| GLV-C-F                                                                            | GCCAGGATCTGGTAATTGCT        | 1077              |
| GLV-seqPCR2-R                                                                      | CTCAAGATCAGGTTATCACTAC      |                   |
| GLV-Sac-F                                                                          | CTTACACCACCTTATGACGACACGAG  | 2600              |
| GLV-Psp-R                                                                          | CCCAGGGTGACAGATCTAATGAAATC  |                   |
| GLV-PCR3-F1                                                                        | GTCACCTCAGAAGTGCCCTC        | 649               |
| GLV-PCR3-R2                                                                        | GTGTCACATTGATGAGAGCCCC      |                   |
| GLV-PCR3-R1                                                                        | GAGGGGCACTTCTGAGAGTGAC      | sequencing only   |
| GLV-PCR3-F2                                                                        | GGGGCTCTCATCAATGTGACAC      | sequencing only   |
| GLV-Psp-F                                                                          | GATTGTGGGGGCTGTGCAG         | sequencing only   |

\* used as primer for the reverse transcription reaction

\*\*size estimated on GLV reference isolate sequence (L13218.1)

**Table S3.** Primers list for antigens amplification

| Primer      | Sequence (5'-3')                       | Primer features                              | Localization on GLV reference (L13218.1) | Localization on J17/10_B sequence |
|-------------|----------------------------------------|----------------------------------------------|------------------------------------------|-----------------------------------|
| GLV-CP-NT_F | <i>ggatcc</i> GCACCTGAAAATATTACTTTTG   | <i>ggatcc</i> <i>Bam</i> HI restriction site | 460-481                                  |                                   |
| GLV-CP-NT_R | <i>gaattc</i> CTACGATGAAAGTGAGCAATTACC | <i>gaattc</i> <i>Eco</i> RI restriction site | 1261-1281                                |                                   |

|              |                                       |                                                                                 |           |
|--------------|---------------------------------------|---------------------------------------------------------------------------------|-----------|
| GLV-CP-CT_F  | <i>ggatcc</i> ACACCACCTTACGATGACACG   | <i>ggatcc</i> <i>Bam</i> <i>HI</i><br>restriction site                          | 2294-3014 |
| GLV-CP-CT_R  | <i>gtcgac</i> TTACACGTCGTCAAGAAAGGTAC | <i>ctgcag</i> <i>Pst</i> <i>I</i><br>restriction site                           | 3229-3250 |
| J1710_B-NT_F | <i>ggatcc</i> CCACCGCGCCAGCCACTG      | <i>ggatcc</i> <i>Bam</i> <i>HI</i><br>restriction site                          | 264-281   |
| J1710_B-NT_R | <i>gtcgactca</i> GACGGGGGCGGAGAGCCG   | <i>ctgcag</i> <i>Pst</i> <i>I</i><br>restriction site;<br><b>tca</b> stop codon | 504-521   |

**Table S4.** Amount of reads mapping on reference viral genome

| Sample | Total reads | Mapped reads | Mapped reads (%) |
|--------|-------------|--------------|------------------|
| HP     | 59,752,148  | 47,567,247   | 79.61            |
| CAT    | 53,209,120  | 45,416,124   | 85.35            |
| P2MER  | 56,509,112  | 42,600,291   | 75.39            |
| JA1710 | 44,256,076  | 326,624      | 0.74             |
