# Supplementary material for: Re-Discovery of Giardiavirus: Genomic and Functional Analysis of Viruses from Giardia duodenalis Isolates
Source: MDPI journal article supplement (doi:10.3390/biomedicines9060654), 2021-06-08
Supplement: s1 [file s1]

A)

>5'-UTR\_HP (120-501nt)

```
GGACUUCGCCACGCUUACACCAUCGAGAACACAUAAAGUGGUGUAAUAUUUAUGUGUUUUGGCUGCGUGUGUCACGAGCACGAUCCAUGGGGGAAUCUAACCC
....[[[[[[[.(((((((((((.((((((((([]]]]].))..)))))))))((((((({{{{{{{{{{{...((([[[[[[[[.]))
AGGUGGUGUUGUGUAUGAUAAAGGUACAAGCCCGUCAACACCACAGGUGGAGAGGGACAGGAGUCCCAUUUCCCCUCUAGAAAACAGCAGUGGUCCGCCCC
).((((((((([[[.}}}})..((([]]..))..)))))))))((([]]..]](((((.....)))..]]]]])).....[[[[[[[.]]..[[[[[
UCAUGCCCUAUGAAACGUUAGGGGGCCGACACUAGUGGGCAAGCCCGAUGGUGUGGGGGACUGGAUAUGGGAACACCAGUCCGUUAAACCCGUACGGCUU
[[[(((((..]].....]]]]]]..]]]]].]]))))).....))(((.....))).....(((((.....(((((
CGCCAGCCUACACCGGGGGGGGCUUAAUCCCCUUAUUCUUGGCACCUGAAAAUAUUACUUUUGACACUUUGAACACACAGAA
.[[[])).....)))((((.....))).....]]].....
```

B)

>5'-UTR\_CAT (120-500nt)

```
AGACUUCGCCACGCUUACACCAUCGAGAACACAUAGGUGGUGUAAUAUUUAUGUGUUUUGGCUGCGUGUGUCACGAGCACGAUCUAUGGGGGAAUCUAACCC
.....[[{{{{[[[[[[[[[.((((((((([]]]]]]]]]]..))))).....).{{{[[[[[(((..((([]]].)....(({{{{{{{{{{.[[.)
AGGUGGUGUUGUGUAUGAUGAGGUACAAGCCCGUCAACACCACAGGUGGAGAGGGACAGGAGUCCCAUUUCCCCCUUUAACAGCAGUGGUCCGCCCC
).((((((((((((..[[[.[]))..]]]]]])))))((([]]]]}}(((((.....)))..}}}}})).....}}}[[[[.[]..[[[[[
UCAUGCCCUAUGAAACGUUAGGGGGCCGACACUAGUGGGCAAGCCCGAUGGUGUGGGGGACUGGAUAUGGGAACCCCAGUCCGUUAAACCCGUACGGCUU
[.[[(((.....]]..]]]]]]..]]]]].)}})))([[[[[{{[[[[[[[[[((((((..[[[[[[[[[.)))))]]]..]]]]]][[[[]))
CGCCAGCCUACACCGGGGGGGGCUUAAUCCCCUUAUUUUGGCACCUGAAAAUAUUACUCUUGACACUUUAAAUACACAGAA
..]]].]]]]]]]]]]](((((((.....)))..)}..]]].....))..)).....
```

C)

>5'-UTR\_GLV-L13218.1 (120-500nt)

```
AGACUUCGCCACGCUUACACCAUUGAGAACACAUAGGUGGUGUAAUAUUUAUGUGUUUUGGCUGCGUGUGUCACGAGCACGAUCUAUGGGGGAAUCUAACCC
.....((....[[[[[[[[[.((((((((([]]]]]]]]]]..))))).....)[[[[[[[[(((..((([]]].)....(([[[[[[[.]]..[[[[[
AGGUGGUGUUGUGUAUGAUGAGGUACAAGCCCGUCAACACCACAGGUGGAGAGGGACAGGAGUCUCAUUUCCCCUCCAAAAACAGCAGUGGUCCGCCCC
).((((((((((((..[[[.[]))..]]]]]])))))..]]]]](((((((.....)))..))]]]]].....]]]..(((((.....(((((
UCAUGCCCUAUGAAACAUUAGGGGGCCGACACUAGUGGGCAAGCCCGAUGGUGUGGGGGACUGGAUAUGGGAACCCCAGUCCGUUAAACCCGUACGGCUU
(.([[[[[[. ....))]]]]))..)))(.((({{{{{{{{{..))((((((((((((.....]]][[]..)))))]]].[[[[[[[. ....}}}}
CGCCAGCCUACACCGGGGGGGGCUUAAUCCCCUUAUUUUGGCACCUGAAAAUAUUACUUUUGACACUUUAAACACACACAA
.}}{.)))))]]](((((((.....)))....]]}.....)).....
```
