# Supplementary material for: Re-Discovery of Giardiavirus: Genomic and Functional Analysis of Viruses from Giardia duodenalis Isolates
Source: MDPI journal article supplement (doi:10.3390/biomedicines9060654), 2021-06-08
Supplement: s1 [file s1]

RdRp\_CAT .....  
RdRp\_L1321 .....T.....  
RdRp\_AF525 .....T.....  
RdRp\_DQ238 .....T.....L.....

RdRp\_HP TEPEEPSHYISMLPKLAKVPNMVREYVSPRSDVPWSETVEELDWREALAILRHRPARTSELVTQWLQLIGRFTAHPDKRALTLLYHWFVRDLTHATKI  
RdRp\_JA17 .....  
RdRp\_P2MER .....  
RdRp\_CAT .....T.....V.Q.....R.....  
RdRp\_L1321 .....V.Q.H.K.....R.....  
RdRp\_AF525 .....  
RdRp\_DQ238 .....

RdRp\_HP KKRNLILLQQPGFWGGYSQSLVGLLRTHLADMIVSELGIGLPGPRATSSRFGTSPTSLAPHYLT LIVPSSVHVQSQKELDLWG LCRSS IYAKHYSNI  
RdRp\_JA17 .....  
RdRp\_P2MER .....T.....  
RdRp\_CAT .....V.....D.....K.T.....  
RdRp\_L1321 .....V.....D.....K.....  
RdRp\_AF525 .....V.....D.....N.....I.....  
RdRp\_DQ238 .....V.....D.....N.....I.....

RdRp\_HP FRYYKLTLP TLVLWAQRLGDKHVTDF [I-] RSVTLGSEIPKYDPHTRLFTSNGVSVGTLIRIRVRHFTHRVLRRETPKCIPVIVGLYREQTLSPESVRLSE  
RdRp\_JA17 .....[IV].....  
RdRp\_P2MER .....[I-].....  
RdRp\_CAT .....[I-].....P.....  
RdRp\_L1321 .....[I-].....A.....M.....  
RdRp\_AF525 .....[I-].....  
RdRp\_DQ238 .....[I-].....

RdRp\_HP PDKILSSLQRASGYSLSLVKKILQITRKPVDPVDARFSQAFPNNWSDLARTAGTFLLTVP LRRFQETMLALSLSVWASTIAAGFTQFLGQGNFSFA  
RdRp\_JA17 .....  
RdRp\_P2MER .....  
RdRp\_CAT .....  
RdRp\_L1321 .....L.....N.....A  
RdRp\_AF525 .....A  
RdRp\_DQ238 .....
