# Supplementary material for: Re-Discovery of Giardiavirus: Genomic and Functional Analysis of Viruses from Giardia duodenalis Isolates
Source: Biomedicines. 2021 Jun 8;9(6):654. doi: 10.3390/biomedicines9060654 (PMC8230311; doi:10.3390/biomedicines9060654)
Supplement: Supplementary file 1 [file biomedicines-09-00654-s001.zip]

Archive with 12 entries (12 files):
- Supplemental Files/Excel File S1.xlsx
- Supplemental Files/Figure S1.pdf
- Supplemental Files/Figure S10.pdf
- Supplemental Files/Figure S2.pdf
- Supplemental Files/Figure S3.pdf
- Supplemental Files/Figure S4.pdf
- Supplemental Files/Figure S5.pdf
- Supplemental Files/Figure S6.pdf
- Supplemental Files/Figure S7.pdf
- Supplemental Files/Figure S8.pdf
- Supplemental Files/Figure S9.pdf
- Supplemental Files/Supplemental Figures Captions and Tables.pdf
