# Supplementary material for: Re-Discovery of Giardiavirus: Genomic and Functional Analysis of Viruses from Giardia duodenalis Isolates
Source: Biomedicines. 2021 Jun 8;9(6):654. doi: 10.3390/biomedicines9060654 (PMC8230311; doi:10.3390/biomedicines9060654)
Supplement: Supplementary file 1 [file biomedicines-09-00654-s001.zip › Supplemental Files/Excel File S1.xlsx]

## Sheet: Foglio2
Description	Max Score	Total Score	Query Cover	E value	Per. Ident	Accession
RNA-dependent RNA polymerase [Sclerotinia sclerotiorum double-stranded RNA virus 3]	144	144	0.91	1e-33	27.67%	AND83002.1
cap-pol fusion protein [Ustilago maydis virus H1]	132	132	0.94	4e-29	25.86%	NP_620728.1
cap-pol fusion protein [Wallemia sebi mycovirus 1]	128	128	0.65	5e-28	30.99%	ALO50138.1
RNA dependent RNA polymerase [Plasmopara viticola lesion associated botybirna 1]	125	125	0.92	7e-27	28.99%	QGZ98417.1
RdRp [Atrato virus]	123	123	0.98	2e-26	29.74%	QHA33710.1
RdRp [Atrato virus]	123	123	0.98	3e-26	29.37%	QHA33708.1
RNA-dependent RNA polymerase [Sclerotinia sclerotiorum botybirnavirus 3]	116	116	0.93	6e-24	27.91%	QDF82045.1
cap-pol fusion protein [Sclerotinia sclerotiorum botybirnavirus 3]	116	116	0.93	9e-24	27.67%	AWY10943.1
cap-pol fusion protein [Botrytis porri botybirnavirus 1]	115	115	0.93	1e-23	27.67%	YP_006390636.1
RNA-dependent RNA polymerase [Bremia lactucae associated dsRNA virus 1]	113	113	0.94	6e-23	26.54%	QIP68006.1
RNA-dependent RNA polymerase [Brent toti-like virus]	109	109	0.85	1e-21	27.57%	QIJ70133.1
RNA dependent RNA polymerase [Plasmopara viticola lesion associated dsRNA virus 1]	105	105	0.68	2e-20	29.69%	QGY93970.1
hypothetical protein [Botrytis cinerea botybirnavirus 1]	103	103	0.92	1e-19	27.08%	AYX40886.1
RNA-dependent RNA polymerase [Delisea pulchra totivirus IndA]	102	102	0.96	2e-19	30.38%	AMB17467.1
polyprotein [Alternaria alternata botybirnavirus 1]	102	102	0.66	2e-19	30.74%	BBH54877.1
polyprotein [Alternaria alternata botybirnavirus 1]	101	101	0.66	6e-19	30.39%	QBZ78320.1
hypothetical protein [Hubei toti-like virus 9]	99.0	99.0	0.88	4e-18	27.09%	YP_009336788.1
RNA-dependent RNA polymerase [Botryosphaeria dothidea victorivirus 1]	96.7	96.7	0.59	2e-17	30.04%	YP_009072433.1
RNA-dependent RNA polymerase [Delisea pulchra totivirus IndA]	96.3	96.3	0.51	2e-17	34.27%	AMB17471.1
RNA-dependent RNA polymerase [Aedes aegypti toti-like virus]	94.4	94.4	0.86	1e-16	28.13%	QEM39133.1
RNA-dependent RNA polymerase [Coniothyrium minitans RNA virus]	93.6	93.6	0.86	2e-16	30.08%	ALM62231.1
RdRp [Murri virus]	93.6	93.6	0.93	2e-16	29.63%	QHA33714.1
RNA dependent RNA polymerase [Diatom colony associated dsRNA virus 6]	93.2	93.2	0.82	3e-16	29.56%	YP_009552791.1
RNA-dependent RNA polymerase [Erysiphales associated totivirus 22]	93.2	93.2	0.95	3e-16	27.63%	QIP68084.1
RNA-directed RNA polymerase [Scaphoideus titanus toti-like virus 1]	92.8	92.8	0.72	4e-16	30.46%	QIJ56904.1
RNA-directed RNA polymerase [Scaphoideus titanus toti-like virus 1]	92.8	92.8	0.72	4e-16	30.46%	QIJ56906.1
RNA-directed RNA polymerase [Scaphoideus titanus toti-like virus 1]	92.8	92.8	0.72	4e-16	30.46%	QIJ56903.1
hypothetical protein 2 [Hubei toti-like virus 10]	92.4	92.4	0.95	4e-16	28.19%	YP_009336493.1
polymerase [Schistocephalus solidus toti-like virus 2]	92.0	92.0	0.95	6e-16	28.61%	QJD26158.1
RNA-dependent RNA polymerase [Aedes aegypti toti-like virus]	91.7	91.7	0.86	1e-15	27.88%	QEM39131.1
RNA-dependent RNA polymerase [Culex vishnui subgroup totivirus]	91.3	91.3	0.89	1e-15	27.96%	BBQ05098.1
putative RNA-dependent RNA polymerase [Alternaria arborescens victorivirus 1]	91.3	91.3	0.86	1e-15	29.55%	YP_009553478.1
putative RNA-dependent RNA polymerase [Panax notoginseng virus B]	90.1	90.1	0.84	2e-15	26.12%	YP_009551937.1
putative RNA-dependent RNA polymerase [Panax notoginseng virus B]	90.1	90.1	0.84	2e-15	26.12%	AWX94599.1
RNA dependent RNA polymerase [Red clover powdery mildew-associated totivirus 3]	90.1	90.1	0.94	3e-15	27.52%	YP_009182181.1
RNA-dependent RNA polymerase [Totiviridae sp.]	90.1	90.1	0.84	3e-15	27.40%	QKN88741.1
putative RNA-dependent RNA polymerase [Brassica campestris chrysovirus 1]	90.1	90.1	0.59	3e-15	28.63%	YP_009667006.1
RNA-dependent RNA polymerase [Erysiphales associated totivirus 2]	89.7	89.7	0.89	3e-15	27.27%	QIP68046.1
PArp-RdRp [dsRNA virus environmental sample]	89.4	89.4	0.86	5e-15	27.46%	AJT39589.1
hypothetical protein [Hubei toti-like virus 1]	89.4	89.4	0.79	6e-15	26.30%	APG76077.1
RNA-dependent RNA polymerase [Cucurbit yellows-associated virus]	88.6	88.6	0.56	8e-15	31.71%	CAA63099.2
RNA dependent RNA polymerase [Diatom colony associated dsRNA virus 10]	88.6	88.6	0.6	9e-15	30.89%	YP_009552793.1
polymerase [Phakopsora pachyrhizi mycovirus]	88.6	88.6	0.92	9e-15	26.09%	ALO81041.1
putative RNA-dependent RNA polymerase [Bipolaris maydis botybirnavirus 1]	88.6	88.6	0.92	1e-14	26.60%	YP_009551519.1
polymerase [Phakopsora pachyrhizi mycovirus]	88.2	88.2	0.92	1e-14	26.09%	ALO81040.1
RNA-dependent RNA polymerase [Erysiphales associated totivirus 16]	87.8	87.8	0.94	1e-14	28.95%	QIP68072.1
RNA dependent RNA polymerase [Umbelopsis ramanniana virus 2]	87.8	87.8	0.73	2e-14	29.47%	VFI65724.1
cap-pol fusion protein [Botryosphaeria dothidea botybirnavirus 1]	87.8	87.8	0.92	2e-14	26.60%	AXP19719.1
putative RNA dependent RNA polymerase [Thrips tabaci associated dsRNA virus 2]	87.0	87.0	0.69	3e-14	32.23%	QNS31036.1
hypothetical protein [Hubei toti-like virus 7]	87.0	87.0	0.91	3e-14	23.86%	APG76025.1
RNA dependent RNA polymerase [Diatom colony associated dsRNA virus 11]	86.7	86.7	0.77	4e-14	30.18%	YP_009552795.1
PArp-RdRp [dsRNA virus environmental sample]	86.7	86.7	0.91	4e-14	25.94%	AJT39583.1
RdRp [Uromyces totivirus A]	86.3	86.3	0.57	4e-14	31.69%	QED43026.1
putative RNA-dependent RNA polymerase [Persea americana chrysovirus]	85.9	85.9	0.67	7e-14	27.11%	YP_009666328.1
RNA-dependent RNA polymerase [Delisea pulchra totivirus IndA]	85.5	85.5	0.58	9e-14	30.58%	AMB17468.1
RNA-dependent RNA polymerase [Persimmon latent virus]	85.5	85.5	0.65	9e-14	32.53%	YP_009025166.1
RNA-dependent RNA polymerase [Delisea pulchra totivirus IndA]	84.7	84.7	0.91	1e-13	26.77%	AMB17466.1
PArp-RdRp [dsRNA virus environmental sample]	84.7	84.7	0.91	2e-13	27.03%	AJT39585.1
PArp-RdRp [dsRNA virus environmental sample]	84.3	84.3	0.91	2e-13	26.78%	AJT39579.1
hypothetical protein [Hubei toti-like virus 11]	84.0	84.0	0.69	3e-13	28.19%	APG76021.1
hypothetical protein [Hubei toti-like virus 8]	83.6	83.6	0.93	3e-13	25.55%	APG76017.1
RNA-dependent RNA polymerase [Erysiphales associated totivirus 10]	83.6	83.6	0.93	4e-13	25.68%	QIP68061.1
RNA-dependent RNA polymerase [Erysiphales associated totivirus 9]	83.2	83.2	0.8	5e-13	29.48%	QIP68059.1
RNA-dependent RNA polymerase [Erysiphales associated totivirus 7]	83.2	83.2	0.8	5e-13	29.83%	QIP68056.1
putative RNA-dependent RNA polymerase [Panax notoginseng virus A]	82.4	82.4	0.83	8e-13	26.97%	YP_009225665.1
putative RNA-dependent RNA polymerase [Puccinia striiformis totivirus 4]	82.4	82.4	0.87	8e-13	27.32%	ATO91013.1
RNA-dependent RNA polymerase [Malassezia restricta virus MrV40L]	82.4	82.4	0.82	9e-13	25.92%	QJA42331.1
RNA-dependent RNA polymerase [Barrymore virus]	82.0	82.0	0.65	8e-13	32.99%	QED21514.1
PArp-RdRp [dsRNA virus environmental sample]	82.0	82.0	0.56	1e-12	28.79%	AJT39587.1
RNA-dependent RNA polymerase [Fusarium poae victorivirus 1]	82.0	82.0	0.58	1e-12	29.84%	YP_009272905.1
RNA-dependent RNA polymerase [Erysiphales associated totivirus 17]	81.6	81.6	0.92	1e-12	27.41%	QIP68074.1
RNA-dependent RNA polymerase [Erysiphales associated totivirus 6]	81.6	81.6	0.93	1e-12	27.36%	QIP68054.1
PArp-RdRp [dsRNA virus environmental sample]	81.6	81.6	0.56	2e-12	28.79%	AJT39581.1
RNA dependent RNA polymerase [Diatom colony associated dsRNA virus 9 genome type A]	81.6	81.6	0.93	2e-12	27.68%	YP_009551611.1
RNA-dependent RNA polymerase [Nigrospora oryzae victorivirus 2]	81.6	81.6	0.57	2e-12	30.42%	AZP53926.1
RNA-dependent RNA polymerase [Erysiphales associated totivirus 1]	80.9	80.9	0.79	3e-12	26.82%	QIP68044.1
RNA-dependent RNA polymerase [Pterostylis sanguinea totivirus A]	80.1	80.1	0.88	5e-12	27.30%	AOX47551.1
RNA-dependent RNA polymerase [Pterostylis totivirus-like]	80.1	80.1	0.88	5e-12	27.30%	AOX47598.1
putative RNA-dependent RNA polymerase [Raphanus sativas chrysovirus 1]	80.1	80.1	0.92	5e-12	23.57%	YP_009667003.1
hypothetical protein 2 [Hubei toti-like virus 2]	79.7	79.7	0.92	7e-12	25.56%	YP_009336496.1
ORF1-ORF2 fusion protein [Maize associated totivirus 1]	79.3	79.3	0.57	8e-12	29.48%	AWD38958.1
RNA-dependent RNA polymerase [Erysiphales associated mitovirus 1]	79.3	79.3	0.92	8e-12	25.00%	QIP68035.1
RNA-dependent RNA polymerase [Delisea pulchra totivirus IndA]	79.3	79.3	0.81	8e-12	27.59%	AMB17470.1
putative RNA-dependent RNA polymerase [Maize associated totivirus]	79.3	79.3	0.57	8e-12	29.48%	AZP55467.1
RNA-dependent RNA polymerase [Maize associated totivirus]	79.3	79.3	0.57	8e-12	29.48%	QJD25933.1
RNA-dependent RNA polymerase [Maize associated totivirus]	79.3	79.3	0.57	8e-12	29.48%	QJD25937.1
RNA-dependent RNA polymerase [Maize associated totivirus]	79.3	79.3	0.57	8e-12	29.48%	QJC70221.1
putative RNA-dependent RNA polymerase [Puccinia striiformis totivirus 5]	79.3	79.3	0.61	9e-12	29.66%	ATO91015.1
RNA-directed RNA polymerase [Spissistilus festinus virus 1]	79.3	79.3	0.64	9e-12	32.85%	YP_003800001.1
polyprotein [Malassezia restricta virus MrV40L]	79.3	79.3	0.92	1e-11	25.94%	QJA42332.1
RNA dependent RNA polymerase [Red clover powdery mildew-associated totivirus 4]	79.0	79.0	0.55	1e-11	30.93%	BAT62484.1
putative RNA-dependent RNA polymerase [Maize associated totivirus]	79.0	79.0	0.5	1e-11	29.95%	AZP55458.1
RdRp [Aedes alboannulatus toti-like virus 1]	79.0	79.0	0.93	1e-11	26.18%	YP_009388609.1
putative RdRp [Phakopsora totivirus B]	78.2	78.2	0.57	2e-11	29.63%	QED42972.1
RNA dependent RNA polymerase [Diatom colony associated dsRNA virus 9 genome type B]	78.2	78.2	0.93	2e-11	27.68%	BAU79502.1
RNA-dependent RNA polymerase [Delisea pulchra totivirus IndA]	78.2	78.2	0.77	2e-11	27.27%	AMB17469.1
ORF1-ORF2 fusion protein [Maize-associated totivirus 1]	78.2	78.2	0.57	2e-11	29.08%	YP_009170670.1
putative RNA-dependent RNA polymerase [Aspergillus fumigatus chrysovirus]	78.2	78.2	0.56	2e-11	29.72%	BBC45614.1
hypothetical protein 2 [Beihai blue swimmer crab virus 3]	77.8	77.8	0.91	2e-11	25.84%	YP_009333276.1
RNA-dependent RNA polymerase [Fitzroy Crossing toti-like virus 2]	77.8	77.8	0.87	3e-11	26.61%	QLJ83492.1
